1           **Opposing roles of the dorsolateral and dorsomedial striatum in the**  
2                           **acquisition of skilled action sequencing in rats**

3

4   **Karly M. Turner<sup>1\*</sup>, Anna Svegborn<sup>2</sup>, Mia Langguth<sup>3</sup>, Colin McKenzie<sup>4,5</sup> and Trevor W.**  
5   **Robbins<sup>4,5</sup>**

6           <sup>1</sup> School of Psychology, University of New South Wales, Sydney, Australia

7           <sup>2</sup> Lund University, Lund, Sweden

8           <sup>3</sup> School of Psychology, The University of Sydney, Sydney, Australia

9           <sup>4</sup> Department of Psychology, University of Cambridge, Cambridge, United Kingdom

10          <sup>5</sup> Behavioural and Cognitive Neuroscience Institute, University of Cambridge,  
11          Cambridge, United Kingdom

12

13   \*Correspondence: [karly.turner@unsw.edu.au](mailto:karly.turner@unsw.edu.au)

14 **ABSTRACT**

15 The shift in control from dorsomedial to dorsolateral striatum during skill and habit formation  
16 has been well established, but whether striatal subregions orchestrate this shift co-operatively  
17 or competitively remains unclear. Cortical inputs have also been implicated in the shift  
18 towards automaticity, but it is unknown if they mirror their downstream striatal targets across  
19 this transition. We addressed these questions using a five-step heterogeneous action  
20 sequencing task in rats that is optimally performed by automated chains of actions. By  
21 optimising automatic habitual responding, we discovered that loss of function in the  
22 dorsomedial striatum accelerated sequence acquisition. In contrast, loss of function in the  
23 dorsolateral striatum impeded acquisition of sequencing, demonstrating functional opposition  
24 within the striatum. Unexpectedly the medial prefrontal cortex was not involved, however the  
25 lateral orbitofrontal cortex was critical. These results shift current theories about striatal  
26 control of behavior to a model of competitive opposition, where the dorsomedial striatum  
27 acts in a gating role to inhibit dorsolateral-striatum driven behavior.

28

29 **Keywords**

30 Striatum, prefrontal cortex, orbitofrontal cortex, cortical, skill, habit, action.

31

## 32 INTRODUCTION

33           There is mixed consensus on exactly how habits and skills interact. They are two  
34 separate descriptors of behavior with overlapping and distinct features (Dezfouli & Balleine,  
35 2012; Graybiel & Grafton, 2015; Jin & Costa, 2015; Robbins & Costa, 2017). Skills typically  
36 describe refined behavioral repertoires, which may be under goal-directed or habitual control  
37 (or a combination as described by hierarchical accounts). In contrast, habits are defined as  
38 responses that are triggered by stimuli and are autonomous of the outcome value but may  
39 include both skilled and unskilled behaviors. The concept of automaticity captures many of  
40 the shared elements between habits and skills, where the behavior becomes stereotypical,  
41 performed with little variation in a highly efficient manner and without effortful thought  
42 (Ashby, Turner, & Horvitz, 2010). Chunked action sequences provide an opportunity to study  
43 the nexus of automaticity, skills, and habits (Dezfouli, Lingawi, & Balleine, 2014; Graybiel  
44 & Grafton, 2015; Robbins & Costa, 2017). The transition to automaticity in both habits and  
45 skills is paralleled by a well-documented shift in control from the dorsomedial (DMS) to  
46 dorsolateral (DLS) striatum (Ashby et al., 2010; Graybiel & Grafton, 2015; Kupferschmidt,  
47 Juczewski, Cui, Johnson, & Lovinger, 2017; Thorn, Atallah, Howe, & Graybiel, 2010; Yin et  
48 al., 2009). Yet, it is unknown how this transition occurs and how these regions co-ordinate  
49 the control of actions (Bergstrom et al., 2018; Kupferschmidt et al., 2017).

50           Goal-directed behavior, dependent on DMS function, dominates early in instrumental  
51 conditioning but if conditions support habitual responding then the DLS takes control  
52 (Balleine, Liljeholm, & Ostlund, 2009; Yin & Knowlton, 2006; Yin, Knowlton, & Balleine,  
53 2004, 2005, 2006; Yin, Ostlund, Knowlton, & Balleine, 2005). Similarly, in skill learning  
54 there is an early learning phase where actions are variable and slow but as they become  
55 refined and efficient then control shifts from the DMS to DLS (Kupferschmidt et al., 2017;  
56 Lehericy et al., 2005; Miyachi, Hikosaka, & Lu, 2002; Yin et al., 2009). Neural studies  
57 indicate the DMS and DLS operate in parallel during this transition with some degree of  
58 interdependency (Gremel & Costa, 2013; Vandaele et al., 2019; Yin et al., 2009). More  
59 recently it has been shown that the DLS is engaged from the beginning of conditioning and  
60 only after initial experience does the goal-directed system start driving behavior (Bergstrom  
61 et al., 2018; Kupferschmidt et al., 2017; A. C. W. Smith et al., 2021). However, it is unclear  
62 whether the DMS and DLS act via a co-operative or competitive relationship (Balleine et al.,  
63 2009; K. S. Smith & Graybiel, 2016). Dual control accounts suggest these two processes both  
64 contribute to behavior with the relative influence shifting with extended training (Balleine,

65 2019; Balleine & Dezfouli, 2019; Dickinson, 1985; Perez & Dickinson, 2020; Robbins &  
66 Costa, 2017). It was recently proposed that responses reflect the summation of goal-directed  
67 and habitual processes (Perez & Dickinson, 2020). Alternatively, habits may form early but  
68 remain latent or inhibited unless required (Hardwick, Forrence, Krakauer, & Haith, 2019).  
69 Similar accounts may apply to the relative neural contribution of the DMS and DLS to action  
70 control.

71 If these regions operate independently, then loss of function should impair only that  
72 region's function (e.g., loss of DMS leads to impaired goal-directed action), however if they  
73 operate co-operatively or co-dependently then suboptimal performance would be expected in  
74 both functions (e.g. loss of DMS also impairs habit formation). In contrast, an opponent  
75 relationship would predict that loss of function in one region would favour the alternate  
76 structure's function (e.g., loss of DMS leads to *enhanced* habit formation). The role of  
77 cortical inputs may be critical in modulating this striatal balance (Daw, Niv, & Dayan, 2005;  
78 Peak, Hart, & Balleine, 2019). A problematic issue when addressing this question in habits  
79 has been the "zero-sum" interpretation as habits are defined by a lack of goal-directed  
80 features (Balleine & Dezfouli, 2019; Robbins & Costa, 2017; Schreiner, Renteria, & Gremel,  
81 2020). However, a loss of devaluation sensitivity may result from impaired instrumental  
82 learning, rather than habit formation (Balleine & Dezfouli, 2019). Habits are typically  
83 identified by an impairment in action modification when conditions change (e.g., devaluation  
84 or contingency degradation), and rarely as the optimal response in a task. To address this  
85 issue, it was recently suggested habits can be defined by four features: rapid execution,  
86 invariant response topography, action chunking, and insensitivity to outcome value and  
87 contingency (Balleine & Dezfouli, 2019). Hence, we developed a novel rodent paradigm  
88 using a sequence of heterogeneous actions where automated, reflexive responding would lead  
89 to superior performance, to test models of striatal control during the development of  
90 automaticity. We hypothesised that DMS loss of function would causally accelerate, whereas  
91 DLS loss of function would impair, the development of behavioral automaticity.

92

## 93 **RESULTS**

### 94 *A novel five-step action sequencing task for rats*

95 Using a multiple-response operant chamber (Carli, Robbins, Everden, & Everitt,  
96 1983), rats made a nose poke response in each of five holes from left to right to receive a  
97 reward sucrose pellet in the magazine (Figure 1H). After brief training, rats could initiate

98 self-paced sequences during a daily 30 min session (Figure 1G). Importantly, the sequential  
99 nose poke task was self-initiated and not cued. This required the acquisition and then retrieval  
100 of a planned motor sequence, of which the first four actions were never immediately  
101 rewarded. The removal of cues also ensured that the sequence required internal representation  
102 where enhanced performance was due to an improved representation and retrieval of the  
103 sequence rather than an improved ability to detect stimuli (Yin, 2010). It was expected that  
104 following repeated reinforcement the five individual actions would be chunked into a more  
105 efficient unitary motor program. This task would be most efficiently performed by the  
106 development of automaticity and aimed to fit the behavioral criteria for both habits and skills.  
107 *Testing for habitual properties of the heterogenous 5-element response sequence*

108 A classic method used to induce habitual responding is extended training (Dickinson,  
109 1985). We trained rats to perform the sequencing task without cues and then placed half of  
110 them onto a twice daily (extended) training regime, while the other half continued with daily  
111 sessions for 10 days. Outcome-specific devaluation was then used to probe habits through  
112 sensitivity to changes in outcome value. The outcome was devalued by providing free access  
113 to 25 g of the sucrose pellets, allowing the rat to become sated, before recording sequencing  
114 responses for 10 min in extinction. This was compared to a separate counterbalanced session  
115 where rats were sated on grain pellets before testing, thereby leaving the outcome (sucrose  
116 pellets) still valued. Rats were tested in extinction to prevent learning about the change in  
117 outcome value through the experience of earning the outcome in the sated state, thereby  
118 demonstrating whether actions were influenced by changes in inferred outcome value. If the  
119 rats respond less when sated on sucrose pellets than grain pellets, then the specific value of  
120 the outcome was being used to adapt actions and the animal was responding under goal-  
121 directed control. If the rat responded equally after both the sucrose and grain pellets, then  
122 changes in outcome value were not being used to guide actions, indicative of habits. There  
123 was no evidence of habit formation in either group with a significant effect of Devaluation  
124 ( $F_{1,22}=67.78$ ,  $p<0.001$ ) and Hole ( $F_{2,38}=29.66$ ,  $p<0.001$ ), but no main effect of Group  
125 ( $F_{1,22}=0.9$ ,  $p=0.4$ ) or interactions with Group ( $p$ 's>0.3) (Figures 1A, C, E). This indicates both  
126 groups remained goal-directed.

127 Another important factor in habit formation is behavioral variation (Dickinson, 1985).  
128 If rats made a sequencing mistake (most commonly skipping a hole due to insufficient nose  
129 poke depth) the program would wait for the correct response before moving to the next hole.  
130 This allowed rats to correct their mistakes and then continue with the sequence. This resulted  
131 in occasional variation in rewarded sequence structure (e.g., **1-2-4-2-3-4-5-reward**) and

132 promotes some level of self-monitoring to detect where an error was made so it could quickly  
133 be rectified. Variation in sequence structure and attending to actions to detect errors should  
134 retard habit formation. Given there were no differences detected after extended training, the  
135 rats were again split into two groups (n=12/group, balanced for prior training) with one group  
136 moving to an invariant sequencing protocol where errors were punished, and the other group  
137 continued training on the same protocol. In the new, invariant protocol, when rats made a  
138 sequencing error the house light was illuminated for 5 s and they then needed to restart the  
139 sequence from the beginning, ensuring only perfect sequences were rewarded (e.g., 1-2-4-  
140 time out-1-2-3-4-5-reward). Rats were then retested for habitual responding using outcome-  
141 specific devaluation as described above. Across the five holes, there was a main effect of  
142 Devaluation ( $F_{1,22}=38.57$ ,  $p<0.001$ ) and Hole ( $F_{1,30}=9.39$ ,  $p=0.002$ ) and Group ( $F_{1,22}=8.19$ ,  
143  $p=0.009$ ) and Devaluation X Hole X Group interaction ( $F_{4,88}=6.95$ ,  $p<0.001$ ) (Figures 1B, D,  
144 F). Importantly there was a significant Devaluation X Group interaction ( $F_{1,22}=12.11$ ,  
145  $p=0.002$ ), demonstrating devaluation sensitivity was significantly reduced when only perfect  
146 sequences were rewarded. A simple effects test revealed that while the flexible group  
147 remained goal-directed ( $p<0.001$ ), the invariant protocol led to habitual responding as  
148 indicated by the lack of a significant difference in responding between the valued and  
149 devalued conditions ( $p=0.07$ ). There was a clear reduction in the amount of valued  
150 responding with the introduction of the invariant procedure compared to the flexible group  
151 (Figure 1B). We considered if this reduction in responding during the valued session could be  
152 due to poor goal-directed learning, but the chance of producing 5 uncued actions in the  
153 correct order without knowledge of the action-outcome association during training is highly  
154 unlikely. This is thus the first demonstration of habitual responding on a heterogenous action  
155 sequencing task in rodents and all subsequent experiments in this study used this version of  
156 the task.

157         Unfortunately rats rapidly ceased responding under extinction conditions, producing  
158 very few complete sequences, which was not unexpected given the sequencing task uses a  
159 continuous reinforcement schedule (see Figure 1F noting five nose pokes were required per  
160 sequence). This led to floor effects for measuring sequencing behavior (such as timing or  
161 effects on initiation, execution, and terminal elements) and was likely to restore goal-directed  
162 control very quickly when extinction was detected. The significant 3-way interaction  
163 indicated that the flexible group showed outcome devaluation sensitivity on every hole  
164 ( $p<0.001$ ), whereas the invariant group responded habitually on nose pokes 2, 4 and 5  
165 ( $p$ 's $>0.08$ ) but showed outcome sensitivity on nose pokes 1 ( $p=0.02$ ) and 3 ( $p=0.04$ ).

166 However, there was no significant difference in the frequency of nose pokes across holes 1-5  
167 within either the valued or devalued session for the invariant group, indicating that rats did  
168 not perform the initiation, execution, or termination elements significantly more under either  
169 condition. They reduced responding across all holes, indicative of the sequence becoming  
170 chunked into a single motor plan that was no longer under goal-directed control. Although  
171 devaluation is the 'gold-standard' test for detecting habits, the lack of whole sequences  
172 performed and limited scope for reliably detecting differences between experimental groups  
173 where smaller effect sizes were expected, prevented its use in subsequent experiments.

174 In a separate cohort of rats, we then measured hallmark traits of automaticity -  
175 increased speed and reduced variability. Acquisition of sequencing was observed over 15  
176 sessions that were grouped into five blocks of three sessions (Figure 1G). Response times  
177 across the five actions in the first acquisition block were comparable but following further  
178 training, a ballistic response pattern developed. This pattern was characterised by an extended  
179 initiation pause prior to the first element that led into a rapid escalating response pattern from  
180 holes 2-4, being completed with a concatenation pause following the terminal element. Here  
181 the rat anticipates and prepares the next motor chunk - reward retrieval. Data from treatment-  
182 naïve rats (n=36) trained on the finalised version of the sequencing task (see Figure 1G),  
183 indicated that from the first to last block there was a significant change in nose poke duration  
184 at each location (interaction  $F_{2,82}=19.80$ ,  $p<0.001$ ; pairwise comparisons  $p's<0.025$ ) (Figure  
185 1I). The ballistic response pattern began to emerge in the first block with relatively equivalent  
186 variation at each step. By the last block, each action in the sequence became increasingly  
187 faster and less variable, indicative of refined and automated action sequencing. This response  
188 pattern, particularly the initiation and termination delays, are characteristic of motor sequence  
189 chunking (Abrahamse, Ruitenberg, de Kleine, & Verwey, 2013; Sternberg, Monsell, Knoll,  
190 & Wright, 1978). Therefore, the sequential nose poke task leads to chunked action  
191 sequencing with features of both skill and habit formation as defined by rapid execution,  
192 invariant response pattern, evidence of sequence chunking and insensitivity to changes in  
193 outcome value (Balleine & Dezfouli, 2019).

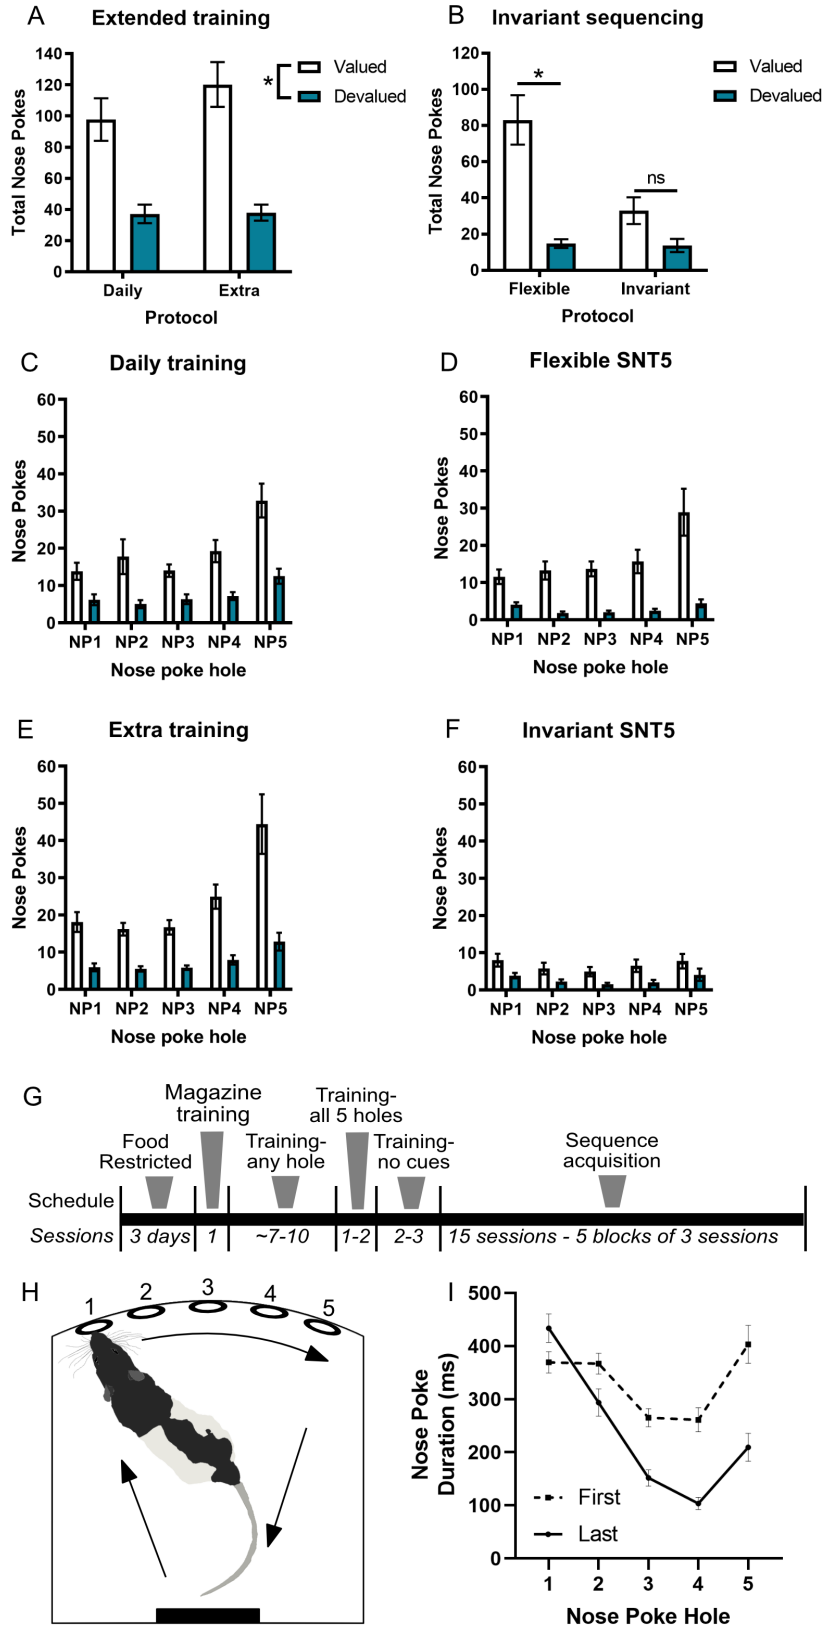

194  
195



196 **Figure 1. The sequential nose poke task leads to ballistic responding.**

197 (A) Extended training did not alter sensitivity to outcome-specific devaluation between the  
198 daily and extended training groups, with both groups responding more in the valued  
199 compared to devalued test session. (C) and (E) show the number of responses across the  
200 sequence elements.

201 (B) Constraining rewards to only perfect sequences with time-outs for any errors in the  
202 invariant protocol led to habitual responding, while the flexible group remained goal-  
203 directed. (D) and (F) show the number of responses across the sequence elements under the  
204 valued and devalued conditions.

205 (G) The training schedule included habituation to the magazine and nose poke training. The  
206 nose poke cues were rapidly removed once rats were responding to each hole. From the  
207 beginning of the sequence acquisition period only correct five-step sequences were rewarded  
208 and errors were penalised by a brief time out period, after which the sequence had to be  
209 reinitiated (see Methods).

210 (H) Rats were trained to make a five-step nose poke sequences to receive a food reward if  
211 they nose poked into each of the holes in order from left to right.

212 (I) Rats developed a ballistic response pattern across the five holes from the first to last block  
213 of training. Each nose poke was faster and with less variance as the sequence progressed.

214 Data shown as group mean  $\pm$  S.E.M. \* $p < 0.05$ .

215

216 ***DMS-lesioning improved acquisition of action sequencing, while DLS-lesioning impaired***  
217 ***efficient sequencing***

218 *Initial training*

219 To determine if the DMS and DLS work cooperatively or in opposition, subregion-  
220 specific loss of function was required throughout training and 15 sessions of sequence  
221 acquisition (Figure 2A, B). Lesions made via discrete fiber-sparing quinolinic acid infusions  
222 avoided any overlap between the DMS and DLS. Following recovery, rats were food  
223 restricted and trained on the sequencing task (see Figure 1C for schedule). Our a priori  
224 hypothesis was that we would observe divergence between DMS and DLS groups and hence  
225 direct comparisons were made. DLS-lesioned rats took significantly longer to reach training  
226 criteria (Figure 2C; Lesion:  $F_{2,23}=7.80$ ,  $p=0.003$ ) than DMS-lesioned ( $p=0.045$ ) or sham  
227 treated rats ( $p=0.001$ ). Rats then moved to sequence acquisition where only perfect 5-step  
228 sequences were rewarded.

229 *Sequence acquisition*

230 We compared performance measures during acquisition to quantify action sequence  
231 refinement, with a focus on changes between the first (sessions 1-3) and last blocks (sessions  
232 12-15). Across acquisition, DMS-lesioned rats initiated more trials (Figure 2D; Lesion:  
233  $F_{2,23}=6.94$ ,  $p=0.004$ ) than either DLS-lesioned ( $p=0.002$ ) or sham control ( $p=0.005$ ) rats. The  
234 number of trials initiated was equivalent between groups in the first block ( $p>0.3$ ). However,  
235 by the last block there were opposing effects detected between groups (Lesion:  $F_{2,23}=11.59$ ,  
236  $p<0.001$ ). DLS-lesioned rats initiated significantly fewer trials than sham rats ( $p=0.09$ ), while  
237 DMS-lesioned rats completed significantly more trials than sham rats ( $p=0.025$ ); with a  
238 substantial difference between DMS and DLS groups ( $p<0.001$ ). This acquired divergence  
239 between DMS and DLS lesioned rats demonstrated that DMS-lesions enhanced, while DLS-  
240 lesions impaired, initiation of action sequences. As sessions were time limited, performing  
241 more trials indicated greater speed and opportunity for reward, however these trials could  
242 have been either correct or incorrect.

243 The number of correct sequences increased for all groups across acquisition,  
244 indicating all groups were able to learn the five-step sequence. Opposing effects of striatal  
245 lesions were again also observed in the total number of correct sequences. There was no  
246 difference between groups on the first block, yet there was a clear divergence between DMS  
247 and DLS lesioned rats across acquisition (Figure 2E). Our a priori hypothesis was that DMS  
248 and DLS lesions would have opposing effects and a comparison between these lesion groups  
249 found that DMS-lesioned rats completed nearly twice as many correct sequences as DLS-  
250 lesioned rats at the end of acquisition (DMS =  $117\pm 12$ , DLS =  $67\pm 13$ ;  $t_{13}=2.79$ ,  $p=0.015$ ).  
251 Despite the dissociation between groups in both the number of sequences initiated and correct  
252 sequences, there was no difference in the number of incorrect sequences made by each group  
253 (Figure 2F;  $F_{2,23}=0.16$ ,  $p=0.85$ ) and all groups showed a significant reduction in erroneous  
254 sequences from the first to last block ( $p$ 's $<0.01$ ). These results support a model of sequence  
255 learning where the DMS and DLS have opposing roles in the development of automated  
256 behaviors.

### 257 *Sequence timing*

258 We next investigated how striatal lesions influenced the timing of actions within  
259 sequences. Across sequence acquisition, sequence duration significantly reduced (Figure 2G;  
260  $F_{4,92}=6.74$ ,  $p<0.001$ ), indicating increased sequencing efficiency with experience. This is  
261 important as faster execution is considered one of the hallmarks of skill learning and  
262 sequence chunking. Throughout acquisition, DLS-lesioned rats took significantly longer to  
263 execute complete sequences (Lesion:  $F_{2,23}=4.59$ ,  $p=0.021$ ) than sham rats ( $p=0.007$ ), with a

264 trend towards impairment compared to DMS-lesioned rats ( $p=0.059$ ). All groups completed  
265 sequences significantly faster from the first to last block of acquisition (sham,  $t_{10}=2.33$ ,  
266  $p=0.042$ ; DMS,  $t_6=4.78$ ,  $p=0.003$ ; DLS,  $t_7=2.83$ ,  $p=0.026$ ). In the final block, DLS-lesioned  
267 rats took significantly longer to complete sequences (Lesion:  $F_{2,23}=5.87$ ,  $p=0.009$ ) than sham  
268 ( $p=0.004$ ) and DMS-lesioned rats ( $p=0.013$ ), supporting the conclusion that DLS lesions  
269 impaired the development of refined action sequencing. In addition, we examined each  
270 individual rat's standard deviation of sequence duration to determine if variability reduced  
271 with training, as another hallmark of skill learning and automaticity. Only the DMS-lesioned  
272 rats had a significant reduction from the first to last block in their individual sequence  
273 duration variability (sham  $p=0.95$ ; DMS  $p=0.021$ ; DLS  $p=0.16$ ), in agreement with other  
274 measures indicating enhanced automatization of sequencing with DMS lesions  
275 (Supplementary Figure 1C).

276 As the task utilised five spatially heterogeneous responses, the timing of each action  
277 within the sequence was then compared across the initiation (hole 1), execution (holes 2-4)  
278 and terminal (hole 5) responses as well as the nose poke duration within each hole. Nose  
279 poke duration became faster across acquisition (Figure 2H; Block:  $F_{4, 92}=19.57$ ,  $p<0.001$ ) and  
280 developed the characteristic accelerating response pattern (Block X Hole:  $F_{16, 368}=9.07$ ,  
281  $p<0.001$ ). There were no significant differences between groups in the first block of  
282 acquisition (Figure 2H;  $F_{2,23}=0.67$ ,  $p=0.52$ ). However, by the last block, nose poke duration  
283 had stabilised to a ballistic response pattern and the variance in timing had reduced as the  
284 movement became stereotypical. On the last block, there was a main effect of Hole  
285 ( $F_{2,49}=67.84$ ,  $p<0.001$ ) and the Hole X Lesion interaction approached statistical significance  
286 ( $F_{4,49}=2.51$ ,  $p=0.051$ ). Planned post-hoc comparisons found DLS-lesioned rats paused  
287 significantly longer than DMS-lesioned rats on the first two actions of the sequence (hole 1,  
288  $t_{13}=2.28$ ,  $p=0.040$  and hole 2,  $t_{13}=2.92$ ,  $p=0.012$ ) but not the latter half of the sequence  
289 ( $p$ 's $>0.7$ ). These results demonstrated that while DLS-lesioned rats were capable of  
290 extremely fast nose poke responses (see hole 4) and therefore were not exhibiting general  
291 motor impairments (also see locomotion data in Supplementary Figure 1G), they were  
292 significantly delayed in initiating the sequence. These results indicated that the DLS is  
293 important for action selection or retrieval. However, once the sequence was engaged, its  
294 execution was not dependent on intact DLS function.

295 The inter-poke interval between correct nose pokes also speeded with training  
296 (Supplementary Figure 1A, B) indicating improved efficiency. There was a u-shaped pattern  
297 across the curved wall, likely reflecting ambulation requirements ( $F_{3, 45}=44.88$ ,  $p<0.001$ ) but

298 there was no effect of lesion ( $F_{2, 23}=1.04$ ,  $p=0.37$ ) or interactions with treatment groups  
299 ( $p$ 's $>0.1$ ). There was also no effect of group on the latency from leaving the magazine to  
300 starting at hole 1 (Supplementary Figure 1D), indicating all groups were equally as motivated  
301 to initiate sequences. There were also no significant changes in magazine nose poke duration  
302 (Supplementary Figure 1F) or reward collection latency (Supplementary Figure 1E) over  
303 acquisition or between groups suggesting training and lesions did not alter reward motivation.

304         Across numerous measures of performance, our results showed that DMS lesions  
305 accelerate the shift towards automatised, while DLS lesions impair the development of  
306 efficient action sequencing. Delayed sequence initiation but not execution or termination in  
307 DLS-lesioned rats, suggest that the DLS is important for loading the motor program, but once  
308 rats started responding the transition between elements was accurate and rapid, indicative of  
309 action sequence chunking. Cortical inputs to the striatum play an important role in both  
310 adaptive and habitual responding therefore we sought to determine whether subregions within  
311 the prefrontal cortex influence the acquisition of action sequencing. We hypothesised that  
312 cortical regions with inputs into the DLS would impair sequence acquisition, while those  
313 with inputs to the DMS may enhance acquisition.

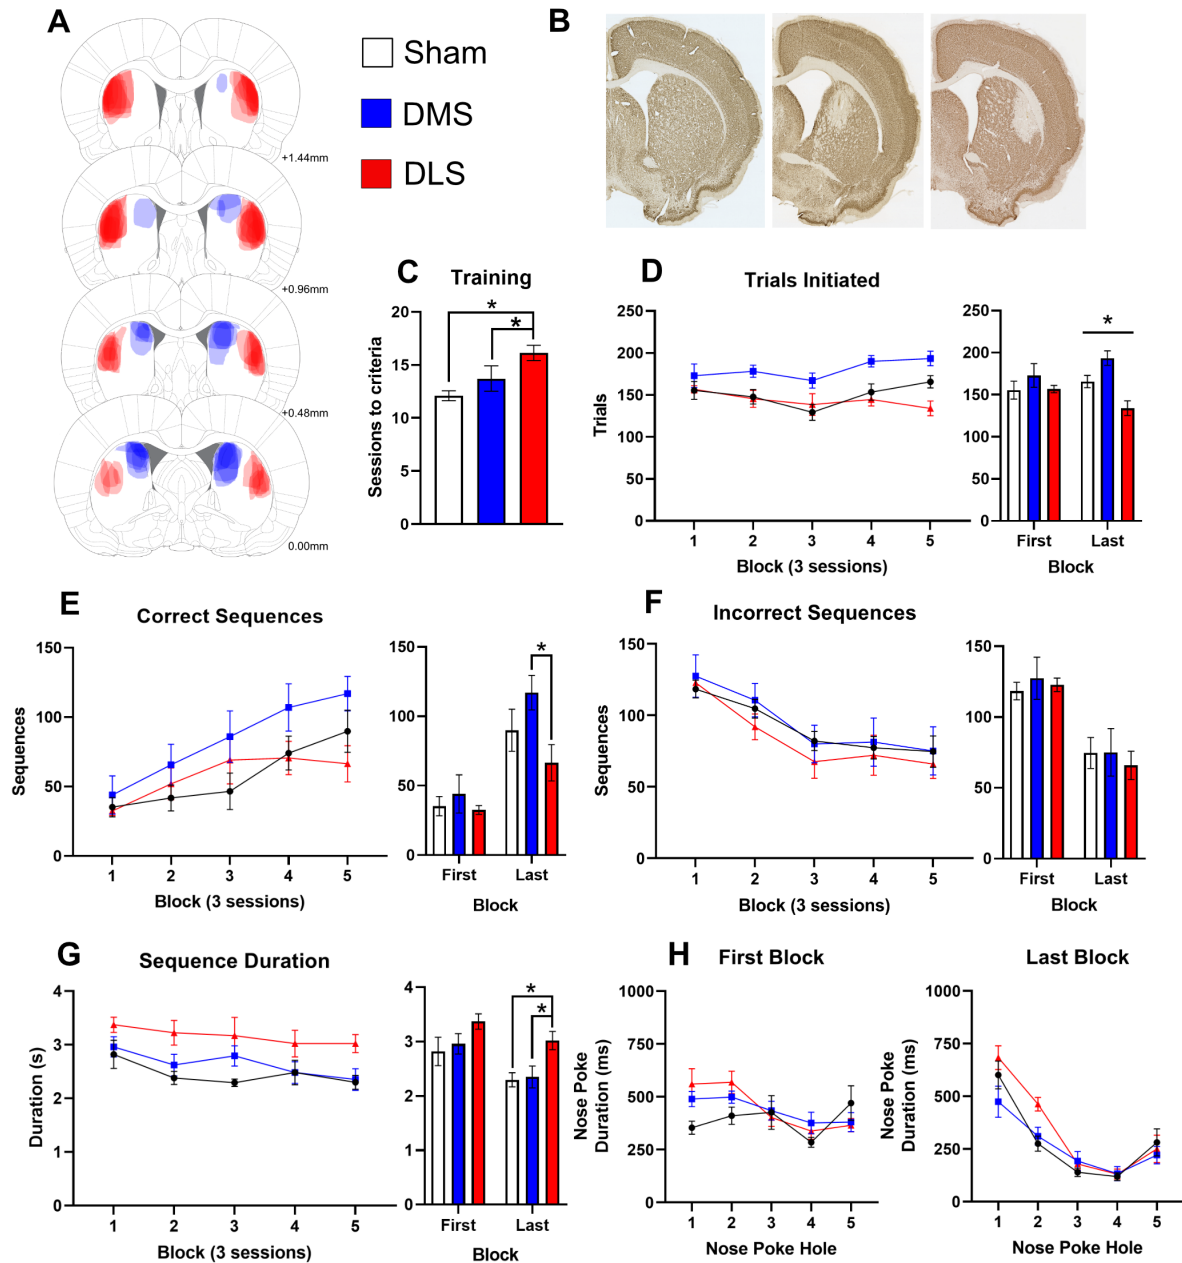

314

315 **Figure 2. DMS-lesioning improved acquisition of action sequencing, while DLS-**  
 316 **lesioning impaired efficient sequencing.**

317 (A) Rats received targeted bilateral lesions with extent illustrated for lesion groups; sham  
 318 (open, n=11), DMS (blue, n=7), DLS (red, n=8).

319 (B) Striatal sections showing NeuN staining in sham (left), DMS (middle) and DLS (right)  
 320 lesioned rats.

321 (C) DLS-lesioned rats required significantly more sessions to reach training criteria than  
 322 sham or DMS-lesioned rats.

323 (D) Left: When acquiring sequencing behavior, DMS-lesioned rats initiated more trials than  
 324 either DLS-lesioned or sham rats. Right: There was no significant difference between

325 groups in the first block, however by the last block, DLS-lesioned rats started fewer trials  
326 and DMS-lesioned rats completed more trials than sham.

327 (E) Left: Contrasting effects of lesions were also observed for the number of correct  
328 sequences. Right: DMS-lesioned rats completed nearly twice as many correct sequences  
329 than DLS-lesioned rats in the last block of acquisition.

330 (F) Incorrect sequences decreased across acquisition, demonstrating all groups learned to  
331 avoid errors.

332 (G) Left: Overall, DLS-lesioned rats took longer to complete sequences than sham rats. Right:  
333 All groups completed sequences significantly faster from the first to last block of  
334 acquisition and in the final block DLS-lesioned rats took significantly longer to complete  
335 sequences than sham and DMS-lesioned rats.

336 (H) Across acquisition, the duration of nose pokes became faster and developed a ballistic  
337 response pattern. Right: By the last block, DLS-lesioned rats paused significantly longer  
338 than DMS-lesioned rats on the first two actions of the sequence, but not the latter half of  
339 the sequence.

340 Data shown as group mean  $\pm$  S.E.M. \* $p < 0.05$ .

341

### 342 ***Lateral OFC but not medial OFC lesions impair sequencing***

343 We first examined the role of the medial (mOFC) and lateral (lOFC) orbitofrontal  
344 cortex, which project to medial and lateral regions of the dorsal striatum, respectively. mOFC  
345 lesions lead to habitual responding via an inability to retrieve outcome value in outcome  
346 devaluation tests (Bradfield, Dezfouli, van Holstein, Chieng, & Balleine, 2015; Bradfield,  
347 Hart, & Balleine, 2018). In contrast, the lOFC is well known for its role in flexible  
348 responding in reversal learning, outcome prediction and devaluation (Gremel et al., 2016;  
349 Gremel & Costa, 2013; Hergig et al., 2019; Izquierdo, 2017; Panayi & Killcross, 2014;  
350 Turner & Parkes, 2020). However, it was unclear whether these regions would enhance  
351 action sequencing.

#### 352 *Acquisition of sequencing*

353 Using the same procedure, we determined if the mOFC and lOFC were required for  
354 action sequencing (Figure 3A, B). There was no effect of lesions on the number of sessions  
355 required during training (Figure 3C). Across sequence acquisition, there was a significant  
356 interaction between groups with lOFC-lesioned rats starting significantly fewer trials than the  
357 mOFC group in the final two blocks (Figure 3D; Lesion X Block,  $F_{8, 180} = 2.72$ ,  $p = 0.024$ ).

358 There was no difference between groups in the first block, but by the end of acquisition the

359 IOFC-lesioned rats initiated fewer trials than mOFC-lesioned rats (Lesion,  $F_{2,27}=4.49$ ,  
360  $p=0.021$ ; post-hoc comparison  $p=0.006$ ). IOFC-lesioned rats were also the only group to  
361 show a significant *reduction* in trials completed from the first to last block ( $t_9=3.17$ ,  
362  $p=0.011$ ). The number of trials initiated is typically a combination of the reduction in trials as  
363 they learn to suppress incorrect sequences and subsequent increase in correct trials as they  
364 become more efficient. There was a main effect of Lesion on the number of correct  
365 sequences completed (Figure 3E;  $F_{2,27}=3.55$ ,  $p=0.043$ ) with IOFC-lesioned rats producing  
366 significantly fewer correct sequences than sham treated rats ( $p=0.014$ ) throughout  
367 acquisition. There was also a significant Lesion X Block interaction for the number of  
368 incorrect sequences produced (Figure 3F;  $F_{5,108}=2.59$ ,  $p=0.034$ ). This was most evident in the  
369 early blocks with more errors from IOFC-lesioned rats in block 2 ( $p=0.026$ ) compared to  
370 sham rats. Together, these results show that IOFC-lesioned rats were producing fewer correct  
371 and more incorrect sequences, suggesting they were impaired in developing efficiency  
372 through invariance and/or learning from negative feedback. mOFC-lesioned rats also made  
373 more incorrect sequences in block 3 (compared to sham: mOFC  $p=0.042$ , IOFC  $p=0.055$ ) but  
374 did not have other deficits, suggesting this to be a subtle impairment.

### 375 *Sequence timing*

376 There was an overall significant reduction in total sequence duration across  
377 acquisition (Figure 3G;  $F_{4,108}=11.11$ ,  $p<0.001$ ), however only the mOFC-lesioned group  
378 showed a significant reduction in duration from the first to last block (sham:  $t_7=1.52$ ,  $p=0.17$ ;  
379 mOFC:  $t_{11}=5.28$ ,  $p<0.001$ ; IOFC:  $t_9=1.14$ ,  $p=0.29$ ). Rats became significantly faster at  
380 executing nose pokes from the first to last block ( $F_{1,27}=26.28$ ,  $p<0.001$ ) with a significant  
381 Block X Hole interaction (Figure 3H;  $F_{4,108}=22.33$ ,  $p<0.001$ ) as response times shifted to a  
382 ballistic response pattern with training. Between treatment groups, there was a significant  
383 Lesion X Hole ( $F_{5,64}=2.68$ ,  $p=0.032$ ) interaction with both lesion groups making faster  
384 responses in the middle of the sequence than sham rats (hole 3  $p$ 's $<0.003$ ), yet IOFC-lesioned  
385 rats were significantly delayed on the terminal action in the sequences compared to mOFC-  
386 lesioned rats (hole 5  $p=0.011$ ). There was no significant change in the duration of time spent  
387 in the magazine (Supplementary Figure 2F) or latency to collect the reward (Supplementary  
388 Figure 2E) either over training or between groups. The inter-poke intervals were also not  
389 significantly different for lesioned rats, although they appeared slower on the first block  
390 leading to a significant Block X Lesion interaction following the shift to sham levels by the  
391 final block (Supplementary Figure 2A, B). The IOFC-lesioned rats were highly efficient at  
392 mid-sequence execution but had relatively elongated terminal nose pokes, when rats usually

393 pause to detect cues associated with pellet delivery and start the next motor plan - reward  
394 collection.

395 In summary, IOFC-lesioned rats were impaired across many measures of action  
396 sequence acquisition. While they performed as well as sham rats in the first block, they did  
397 not adapt efficiently to the requirement to only produce invariant sequences. This was  
398 evidenced by the more gradual reduction in incorrect sequences, consistently fewer correct  
399 sequences and start/stop delays observed when initiating and terminating sequences (despite  
400 unimpaired mid-sequence execution). Given shared impairments in initiating and  
401 automatising sequencing, the IOFC to DLS projection may be important for loading motor  
402 sequences. This is in contrast to mOFC-lesions, which reduced their sequence duration  
403 across acquisition, but also produced more incorrect responses during acquisition, unlike the  
404 enhancing effects of DMS lesions.



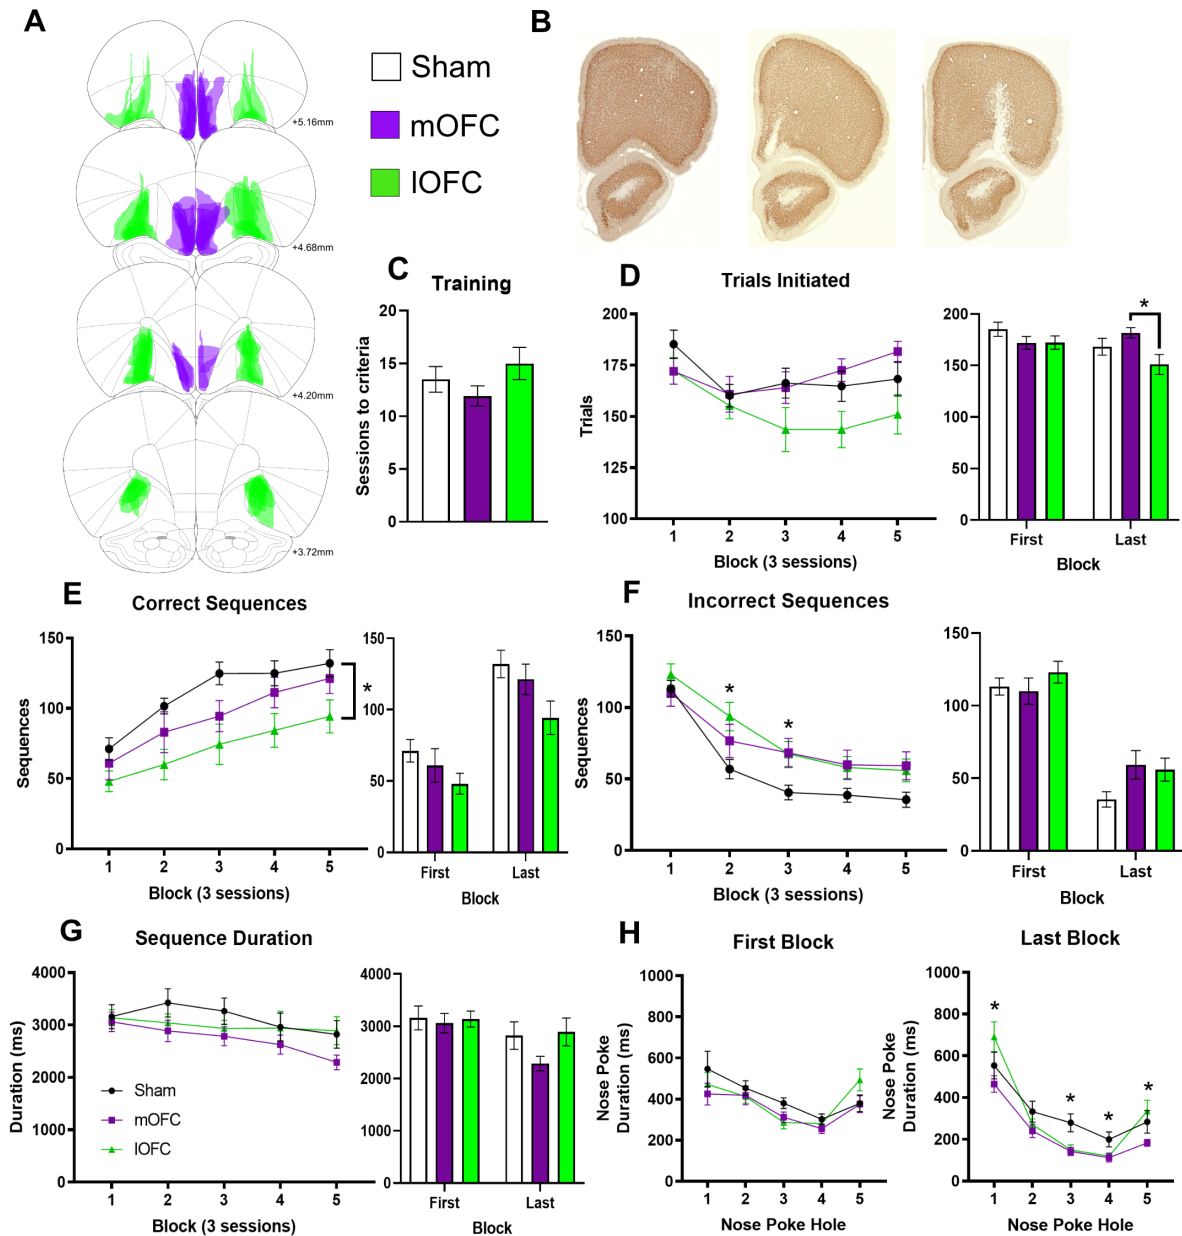

405

406 **Figure 3. Lateral OFC but not medial OFC lesions impair sequencing.**

407 (A) Rats received targeted bilateral lesions as shown for sham (open, n=10), mOFC (purple,  
 408 n=8) or IOFC (green, n=12).

409 (B) Sections showing NeuN staining for sham (left), mOFC (middle) and IOFC (right) lesion  
 410 groups.

411 (C) Sessions to reach training criteria was not different between groups.

412 (D) The number of trials initiated was not different in the first block, but significantly reduced  
 413 in IOFC- compared to mOFC-lesioned rats after acquisition.

414 (E) IOFC-lesioned rats producing significantly fewer correct sequences than sham rats across  
 415 acquisition.

416 (F) All rats significantly reduced incorrect sequences over acquisition. During early  
417 acquisition, IOFC-lesioned rats continued to make more incorrect sequences in block 2  
418 and both lesion groups made more errors in block 3 compared to the sham group.  
419 (G) There was a trend for reduced sequence execution time across acquisition, however only  
420 the mOFC-lesioned group significantly reduced sequence duration from the first to last  
421 block.  
422 (H) At the end of acquisition, nose poke duration was faster in lesioned rats than sham  
423 controls in the middle of the sequence, however IOFC-lesioned rats were slower at  
424 terminating the sequences compared to mOFC-lesioned rats.  
425 Data shown as group mean  $\pm$  S.E.M. \* $p < 0.05$ .

426

### 427 ***Prelimbic and infralimbic cortex lesions do not alter sequence acquisition.***

428 To further understand the role of the medial prefrontal cortex, we next examined the  
429 effects of excitotoxic lesions of the prelimbic (PrL) and infralimbic (IL) cortex. These  
430 regions are associated with goal-directed and habitual behavior respectively, with the PrL  
431 having strong inputs to the DMS and the IL into the ventral striatum (Coutureau & Killcross,  
432 2003; Hart, Leung, & Balleine, 2014; Heilbronner, Rodriguez-Romaguera, Quirk,  
433 Groenewegen, & Haber, 2016; Mailly, Aliane, Groenewegen, Haber, & Deniau, 2013).

#### 434 *Acquisition of sequencing*

435 Identical procedures were implemented in PrL and IL lesioned rats (Figure 4A, B).  
436 All groups reached criteria before moving onto the sequence acquisition (Figure 4C). The  
437 number of correct sequences significantly increased across acquisition (Figure 4E;  $F_{2, 51} = 26.57$ ,  $p < 0.001$ ) and incorrect sequences significantly decreased (Figure 4F;  $F_{2, 41} = 58.93$ ,  $p < 0.001$ ) with no effect of treatment or interactions on trials initiated (Figure 4D) or the  
440 number correct or incorrect sequences (Figure 4E, F).

#### 441 *Sequence timing*

442 While there was a main effect of Block (Figure 4G;  $F_{3, 64} = 2.95$ ,  $p = 0.041$ ) on total  
443 sequence duration where rats became significantly faster at executing the sequence with  
444 training there was no significant difference between lesion groups for nose poke duration  
445 across sequence or magazine (Supplementary Fig 3F), inter-poke intervals between holes  
446 (Supplementary Fig 3E), or interval from hole 5 to the magazine (Supplementary Fig 3D).  
447 Nose poke duration did reduce from first to last block ( $F_{1, 22} = 7.61$ ,  $p = 0.011$ ) across all lesion  
448 groups and a significant Block X Hole interaction (Figure 4H;  $F_{4, 2} = 8.64$ ,  $p < 0.001$ ) identified

449 a ballistic-like response pattern with training. These results indicated that the PrL and IL  
 450 cortex were not critical for the acquisition of action sequencing.

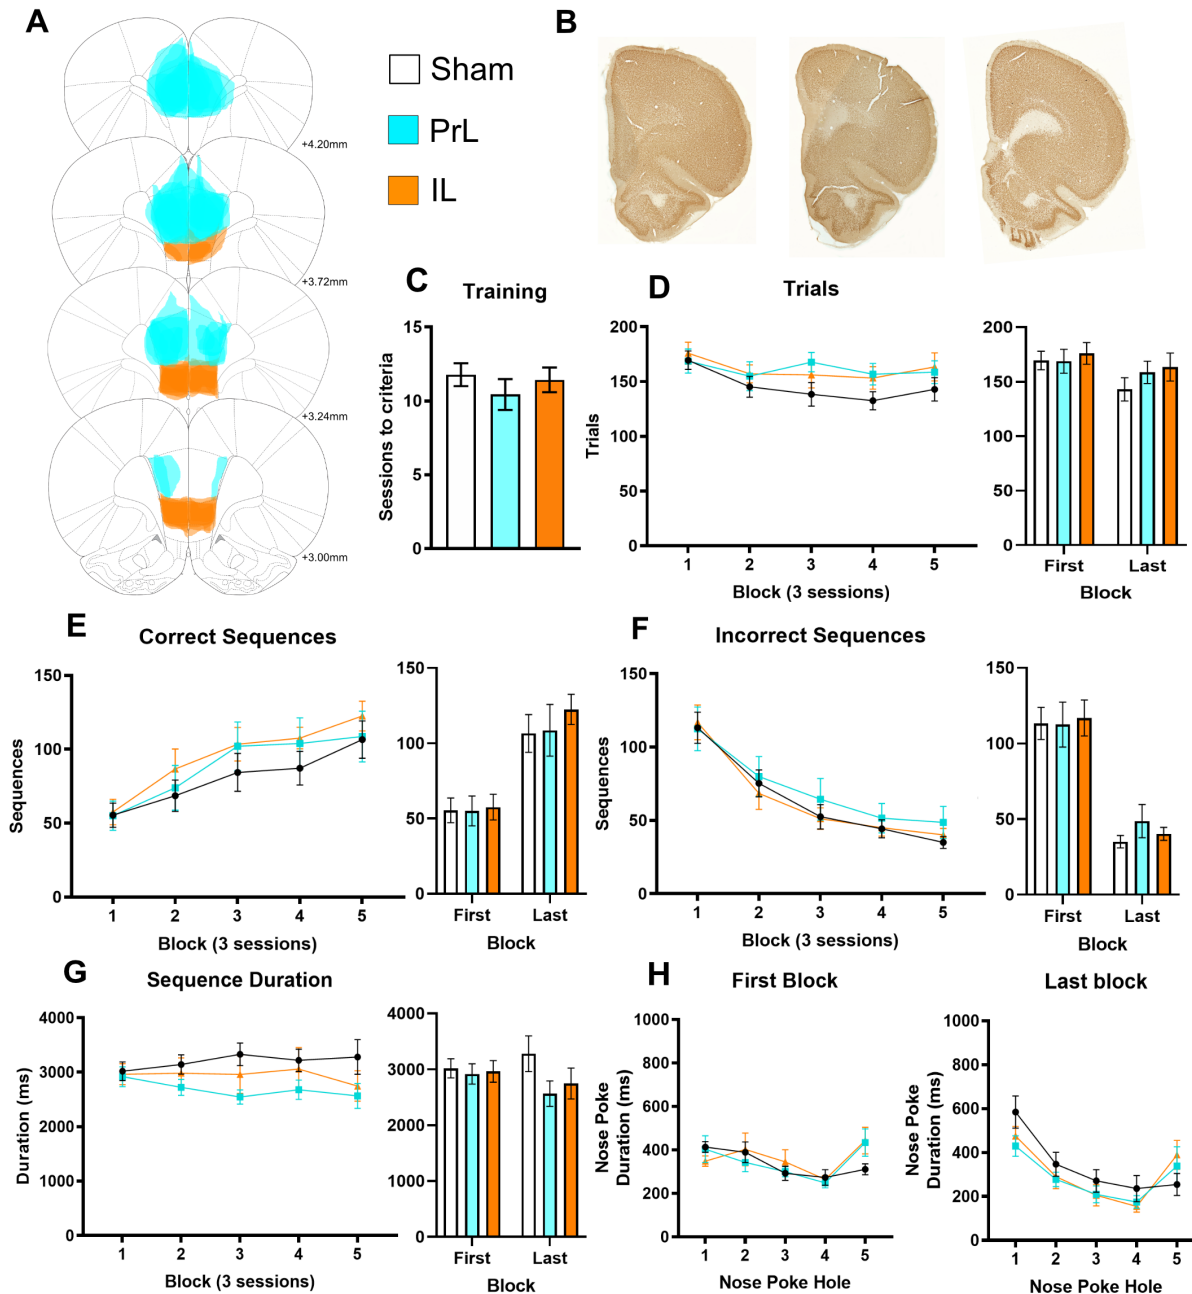

451  
 452 **Figure 4. Prelimbic and infralimbic cortex lesions do not alter sequence acquisition.**

453 (A) Rats received targeted bilateral lesions as shown for sham (open, n=9), PrL (cyan, n=9) or  
 454 IL (orange, n=7).

455 (B) Sections showing NeuN staining in sham (left), PrL (middle) and IL (right) lesion groups.

456 (C) The number of trials initiated was not different between groups.

457 (D) The number of correct sequences significantly increased without an effect of lesion.

458 (E) Incorrect sequences significantly decreased, and this was also not different between

459 groups.

- 460 (F) Rats became significantly faster at executing the sequence with training with no  
461 significant differences between groups.
- 462 (G) Total sequence duration reduced across the acquisition period but was not different  
463 between groups.
- 464 (H) Nose poke duration shifted to the characteristic accelerating pattern with no effect of PrL  
465 or IL lesion.
- 466 Data shown as group mean  $\pm$  S.E.M. \* $p < 0.05$ .

467

## 468 **DISCUSSION**

469 We found that heterogenous action sequences can come under habitual control, as  
470 defined by outcome devaluation insensitivity, when the parameters of this task promoted  
471 automaticity. Using this task, we provide the first direct causal evidence that the DMS and  
472 DLS have opposing roles on the acquisition of action sequencing. We demonstrated this  
473 competitive relationship by showing that DMS lesions enhanced action sequence acquisition  
474 and DLS lesions impaired it. The finding of striatal opposition is consistent with studies  
475 showing concurrent activity within the DMS and DLS across numerous tasks and training  
476 stages (Thorn & Graybiel, 2014). These results also build on recordings in rodents showing  
477 that disengagement of the DMS predicts skill learning by allowing the DLS to take control  
478 (Kupferschmidt et al., 2017). And that the DMS gates habit formation in the T-maze as  
479 although the DLS is active early during learning it only gains control when DMS activity  
480 subsides (Thorn et al., 2010). While the IOFC was required for efficient sequencing,  
481 surprisingly lesions to medial prefrontal cortical subregions (mOFC, PrL and IL) did not  
482 impair nor enhance acquisition of action sequencing. Together, these results demonstrate that  
483 reduced DMS activity facilitates the acquisition of DLS-dependent skills and habits, but this  
484 is not the product of modulation from cortical inputs. Although we did not investigate the  
485 anterior cingulate cortex, our results suggest the source of arbitration between these parallel  
486 corticostriatal loops is independent of these prefrontal inputs to the dorsal striatum.

487

### 488 ***Opposing roles of the dorsal striatum in the acquisition of action sequences***

489 Previous studies have shown habitual responding can be acquired despite DMS  
490 lesions (Gremel & Costa, 2013; Hilario, Holloway, Jin, & Costa, 2012), suggesting a DMS-  
491 dependent goal-directed acquisition phase is not required for the development of habits. We  
492 provide evidence for this hypothesis by demonstrating not only that DMS-lesioned rats were  
493 capable of performing automatised action sequences, but that they show *enhanced* acquisition

494 and reduced variability of this habit-like response pattern. These results not only indicated  
495 that DMS-dependent learning was not critical for efficient task acquisition, but that the DMS  
496 hampers the development of action sequencing. In contrast, rats with DLS-lesions were  
497 impaired in acquiring action sequencing, which is entirely consistent with this task measuring  
498 skill formation and sequencing under habitual control.

499         These results are also consistent with findings from three studies where the inverse  
500 pattern (i.e. DMS impairs and DLS enhances performance) was found using tasks that require  
501 flexible or goal-directed responding. Moussa, Poucet, Amalric, and Sargolini (2011) found  
502 DMS lesions impaired T-maze acquisition, but DLS lesions enhanced learning rate. A second  
503 example of striatal opponency was demonstrated by Bradfield and Balleine (2013), where  
504 removing the influence of the DLS enhanced goal-directed control beyond the capacity of  
505 sham treated rats. A third example comes from a study of visual discrimination, where  
506 silencing the DLS during the choice phase led to faster learning, again highlighting that  
507 removing DLS activity enhances adaptive behaviors beyond those seen when both regions  
508 are functional (Bergstrom et al., 2018). When considered with the results of the current study,  
509 these results support a competitive opponency between the DLS and DMS by utilising tasks  
510 optimised by flexible responding or automaticity (see Figure 5).

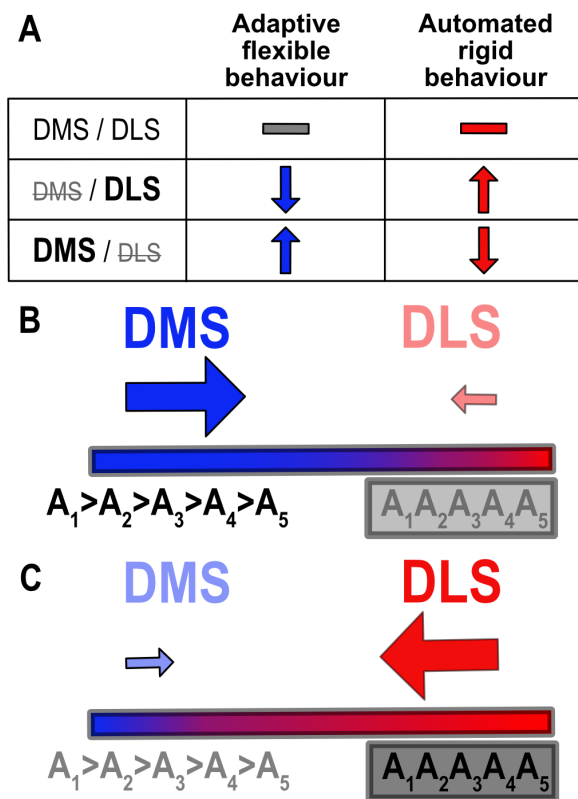

**Figure 5. Competitive parallel control by the dorsomedial and dorsolateral striatum.**

(A) Studies of flexible behavior have found DMS lesions impair performance as anticipated given the role of the DMS in goal-directed behaviors. However, studies have also found DLS-lesioned rodents showed *enhanced* learning compared to controls, suggesting a competitive influence of DLS functions on DMS-dependent behaviors (Bergstrom et al., 2018; Bradfield & Balleine, 2013; Moussa et al., 2011). We build on this model by demonstrating that the converse is true for automatization of

526 actions. DLS lesions unsurprisingly impaired performance where the task demands habit-  
 527 like behavior. However, we found that DMS lesions enhanced acquisition, suggesting this  
 528 competitive relationship is bidirectional.

529 (B) Based on these findings we propose a model of opponency between the DMS and DLS.  
 530 In situations where adaptive or goal-directed behaviors are critical, DMS control  
 531 dominates and results in performance of individual, slower actions that can be easily  
 532 modified. Lesioning the DLS biases behavior in this direction. We suggest that just as a  
 533 purple color gradient can be made bluer through either adding more blue (enhanced DMS  
 534 activity) or not adding as much red (DLS lesioning); the relative balance is critical such  
 535 that the loss of one region's function enhances expression of the other. Parallel  
 536 development of both pathways incorporates redundancy such that either region can take  
 537 control as situations change.

538 (C) Tasks requiring automatized actions, such as action sequencing and chunking, occur  
 539 under DLS-dominated control. Disengagement of the DMS to allow DLS domination has  
 540 been proposed in the transition from goal-directed to habitual action and in skill  
 541 refinement (Kupferschmidt et al., 2017). This study demonstrates that habit-like  
 542 behaviors can also be expedited via DMS loss of function, indicative of functional  
 543 opponency.

544

545 ***Habits, skills and automaticity***

546 Here we capitalised on a task that is dependent on reduced behavioral variation (rather  
547 than overtraining) to examine the neural underpinnings of automatisaion, reflecting the  
548 shared features of habits and skills. How the similarities and differences between habits and  
549 skills can be consolidated has been a question of growing interest that remains largely  
550 unanswered (Ashby et al., 2010; Graybiel & Grafton, 2015; Hardwick et al., 2019; Robbins  
551 & Costa, 2017). While acknowledging that each is defined by specific characteristics, these  
552 results sit at the intersection of skills and habits and are therefore discussed in this broader  
553 context.

554 Automaticity is commonly measured in skill learning using tasks such as rotarod  
555 (Kupferschmidt et al., 2017; Yin et al., 2009) and action sequencing paradigms, including  
556 fixed ratio lever pressing or shorter two-step sequencing (e.g. L-R lever press) (Cui et al.,  
557 2013; Garr & Delamater, 2019; Jin, Tecuapetla, & Costa, 2014; Tecuapetla, Jin, Lima, &  
558 Costa, 2016; Wassum, Ostlund, & Maidment, 2012; Yin, 2009, 2010; Yin, Ostlund, et al.,  
559 2005). A four-step (L-L-R-R) lever press task was developed using no experimental cues and  
560 a self-paced design (Geddes, Li, & Jin, 2018), however, to our knowledge, models of skill  
561 and habit formation have not been tested in rodent operant paradigms requiring more than  
562 two different response elements. We found that DLS-lesions specifically affected sequence  
563 initiation rather than execution elements, which is in agreement with the suggestion that DLS  
564 activity is important when starting and stopping motor sequences, rather than the mid-  
565 sequence actions, which is evident in task bracketing patterns within the DLS (Jin & Costa,  
566 2010; K. S. Smith & Graybiel, 2013; Sternberg et al., 1978). It has been suggested that rather  
567 than identifying the specific motor actions that will be performed, DLS activity may be  
568 important for bracketed groups of familiar motor actions as a chunk (K. S. Smith & Graybiel,  
569 2013). Our results lend support to this suggestion as DLS-lesioned rats did not have deficits  
570 in performing the five actions in the correct order (which would be evidenced by an increase  
571 in errors) and displayed a ballistic response pattern synonymous with chunking but were  
572 impaired when starting the sequence. This has important implications for the role of the DLS  
573 in automaticity, habits, and skill formation. Although it is unclear how each concept applies  
574 across initiation, execution, and termination elements with action sequences, it is plausible  
575 that the DLS is important for retrieving and initiating rehearsed behavioral patterns,  
576 promoting their rapid, stimulus-driven and refined expression. Isolating the role of striatal  
577 circuits within sequence performance is also critical for understanding movement disorders

578 such as Parkinson's disease, where action initiation is impaired (Agostino, Berardelli,  
579 Formica, Accornero, & Manfredi, 1992).

580 We demonstrate that heterogenous sequences do lead to habitual responding under  
581 certain conditions. Reduced variation through rigid repetition may be a critical condition for  
582 the development of habits. We observed this when establishing the task, but also as  
583 significantly reduced variation in sequence duration across acquisition in DMS-lesioned rats.  
584 Indeed, using an FR5 lever press task Vandaele and Janak (2021) recently reported that rats  
585 performed habitually under strict sequencing conditions (DT5), but that allowing rats to  
586 either make mid-sequence reward port entries or greater than five presses reverted behavior  
587 to goal-directed control. This was accompanied by high DLS and low DMS activity during  
588 the DT5 task, but relatively similar activity across the striatum in the task variants. As  
589 pointed out by Dickinson (1985), "*contrary to popular belief, habit formation is not a simple*  
590 *consequence of over-training or practice. Rather it appears to arise because over-training*  
591 *typically tends to reduce the variation in behaviour...*" (page 76). Similarly, Daw et al.  
592 (2005) suggested that the shift from a model-free to model-based control is dependent on  
593 uncertainty, where even providing two choices will prevent model-free responding. Further,  
594 Drummond and Niv (2020) suggest that the level of *certainty* within the model-based and  
595 model-free estimates may determine which system becomes engaged. A recently proposed  
596 dual-system model suggests goal-directed and habitual responding are acquired in parallel,  
597 with prediction error determining the associative strength of these processes and responses  
598 reflecting their summation (Perez & Dickinson, 2020). This account suggests that as actions  
599 become more stereotypical the goal-directed contribution wanes and habitual responding  
600 remains. Experimental support for the notion that habits are not merely the product of  
601 overtraining was also demonstrated across five human studies that failed to produce habitual  
602 responding (de Wit et al., 2018) and by a recent consortium across four laboratories where  
603 extended training did not produce habitual responding (Pool et al., 2021). Overtraining also  
604 did not elicit habitual responding on a rodent L-R lever pressing task (Garr & Delamater,  
605 2019). In addition, evidence from Hardwick et al. (2019) suggests habits form easily, but  
606 their expression can be overruled by goal-directed control such that time to act is also critical  
607 factor in determining which is expressed. Action sequencing that is invariant, outcome  
608 insensitive and rapid as in this sequential nose poke task provides the ideal platform to  
609 examine the neural circuits that support automaticity, habits, and skill formation.

610

611 ***Cortical functions in action sequencing***



612 Cortical inputs may play a critical role in goal-directed learning, habit formation and  
613 skill development but less is known about how they operate across transitions and in action  
614 sequences (Bassett, Yang, Wymbs, & Grafton, 2015; Bergstrom et al., 2018; Bradfield et al.,  
615 2018; Gremel & Costa, 2013; Killcross & Coutureau, 2003; Kupferschmidt et al., 2017; K. S.  
616 Smith & Graybiel, 2013; Turner & Parkes, 2020). A link between cortical disengagement and  
617 skill refinement has been observed using imaging in humans (Bassett et al., 2015) and  
618 recordings in rodents (Kupferschmidt et al., 2017). As these are correlational findings,  
619 reduction in cortical activity may not be critical to skill refinement but may be a consequence  
620 of changes in other regions within cortico-striatal loops. Previous research has associated PrL  
621 with goal-directed actions and the IL with habits. Using a robust lesioning approach, our  
622 results provide the first evidence that these regions are not required to learn and perform  
623 heterogenous action sequences.

624 The PrL cortex is important for early stages of goal-directed learning but not for habit  
625 formation (Corbit & Balleine, 2003; Coutureau & Killcross, 2003; Hart, Bradfield, Fok,  
626 Chieng, & Balleine, 2018), which is consistent with the lack of effect in this study where  
627 goal-directed control was minimised. The fact that PrL lesions did not *enhance* sequencing  
628 indicates that the PrL inputs to the DMS are not solely responsible for maintaining DMS  
629 functions or goal-directed interference on this task and the role of the PrL cortex is clearly  
630 separable. This independence of functions between the PrL cortex and DMS suggests the  
631 switch in control within the dorsal striatum is not driven by the PrL cortex.

632 Lesioning the IL did not impair sequence acquisition as would have been predicted  
633 from devaluation studies where IL-lesions result in goal-directed responding (Coutureau &  
634 Killcross, 2003). Shipman, Trask, Bouton, and Green (2018) suggested that control shifts  
635 from the PrL to IL with experience but prior to habit formation, highlighting a role in the  
636 transition of control. Further, K. S. Smith and Graybiel (2013) proposed that the IL and DLS  
637 operate together to establish habits, however we found no IL-related deficit in sequence  
638 acquisition as was observed for DLS lesions. This suggests that the IL was not required for  
639 the automatised or chunking of action sequences. It is important to note that there are  
640 differences between the electrophysiological signatures of DLS and IL in habits (e.g., after  
641 devaluation), and there are no direct IL-DLS projections, suggesting they have independent  
642 roles in habitual responding. In addition, IL activity does not reflect the habitual nature of  
643 individual decisions, indicating it is not arbitrating between goal-directed and habitual  
644 strategies but instead reflects overall response tendencies or states (K. S. Smith & Graybiel,  
645 2013). Haddon and Killcross (2011) found that the IL plays a role when goal-directed and

646 habitual associations are in competition, but this was not the case in our study as flexible,  
647 goal-directed responding was not advantageous. Our results support the argument that  
648 competition, particularly in the context of extended training, may be an important condition  
649 for IL-dependent habits (or suppression of goal-directed control), as with little-to-no  
650 competition, IL lesions do not influence action sequence acquisition.

651 In contrast, IOFC lesions reduced total sequences with fewer correct sequences (and  
652 increased incorrect sequences) and delayed sequence termination. While largely consistent  
653 with deficits in DLS-lesioned rats, two key differences emerged (i) IOFC lesioned rats were  
654 relatively slower to terminate sequences and (ii) had higher rates of incorrect responses. The  
655 terminal delay in our study, as well as the delayed reward collection latency reported in  
656 Hervig et al. (2019), may be due to the IOFC's role in predicting outcomes based on  
657 Pavlovian cues as the reward delivery was cued (Ostlund & Balleine, 2007; Panayi &  
658 Killcross, 2014). This is important given the IOFC has been implicated in perseverative and  
659 compulsive behaviors, which lack appropriate termination (Burguiere, Monteiro, Feng, &  
660 Graybiel, 2013; Chudasama & Robbins, 2003). The IOFC has also been implicated in credit  
661 assignment, which is likely to be important when chaining a series of actions where only the  
662 final element is followed by reward (Noonan, Chau, Rushworth, & Fellows, 2017). Impaired  
663 credit assignment may have diminished learning about more distal sequence elements and  
664 increase sequencing errors. The role of the IOFC in using Pavlovian occasion setting cues  
665 may also explain the impairment in reducing incorrect responses, which were signalled by the  
666 illumination of the house light in this task (Shobe, Bakhurin, Claar, & Masmanidis, 2017).  
667 Prior studies have found that large IOFC lesions produced similar effects to those seen in  
668 DMS-lesioned animals performing under both random ratio (RR) and random interval (RI)  
669 schedules (Gremel & Costa, 2013). The lack of devaluation sensitivity in both RR and RI  
670 contexts following IOFC loss of function was suggested to indicate its role in conveying  
671 action-value information. Our results support this notion as an impairment in learning rather  
672 than in increase in habit formation, given they made more incorrect responses and performed  
673 fewer sequences. Possible roles of the anterior cingulate cortex and motor cortex remain to be  
674 tested (Ostlund, Winterbauer, & Balleine, 2009). However, a recent study found that while  
675 DLS lesions impaired motor skill performance, motor cortex inputs to the DLS were not  
676 required (Dhawale, Wolff, Ko, & O'Leary, 2021). Future studies should confirm if IOFC to  
677 DLS projections are critical to action sequencing and isolate the IOFC deficits linked to this  
678 specific pathway.

679 Overall, the cortical effects (or lack thereof) described here are problematic for the  
680 popular model of top-down control applied by cortical regions over subcortical structures.  
681 This may simply not apply in the same way to behaviors that dominate motor rather than  
682 cognitive cortico-striatal loops. This lack of effect is significant in the context of  
683 understanding where arbitration of striatal control originates and highlights the importance of  
684 considering tasks that optimise automatic, habitual actions to understand cortico-striatal  
685 functions. Perhaps when there is little or no need for goal-directed control, there is also little  
686 need for medial prefrontal cortical input. However, we also did not observe enhanced  
687 acquisition, like the DMS-lesioned rats, which may be due to redundancy within the cortex  
688 given multiple sub-regions project to the DMS. We have determined that the medial  
689 prefrontal cortex is not responsible for DMS disengagement in skilled, habitual action  
690 sequences.

691

### 692 ***Conclusions***

693 These findings provide the strongest evidence yet for competition between DMS and  
694 DLS functions in the development of behavioral automatisation. We found medial prefrontal  
695 subregions were largely unnecessary for sequence acquisition, however lesions to the IOFC  
696 impaired action sequencing. Developing an innovative spatial heterogeneous action  
697 sequencing task, we were able to isolate initiation, execution and termination specific  
698 deficits. These results provide empirical support for a model where DMS activity limits the  
699 formation of automated behavior, emphasising its role in gating the acquisition of skills and  
700 habits.

701

### 702 **Acknowledgements**

703 NHMRC Early Career Fellowship (GNT1122221) to KMT. This research was funded in  
704 whole, or in part, by the Wellcome Trust (Grant 104631/Z/14/Z to TWR). For the purpose of  
705 open access, the author has applied a CC BY public copyright licence to any Author  
706 Accepted Manuscript version arising from this submission. Experiments were conducted  
707 under a Home Office Project Licence held by Dr. Amy Milton and we thank her for  
708 supporting our research.

709

### 710 **Author contributions**

711 KMT and TWR designed the experiments; KMT, ML, AS, CM performed the experiments;

712 KMT wrote the first draft and ML, AS, CM, TWR reviewed and edited the manuscript.

713

714 **Declaration of interests**

715 The authors declare no competing interests.

716 **MATERIALS AND METHODS**

717

718 **EXPERIMENTAL SUBJECT DETAILS**

719 The task was developed in treatment naïve rats where we examined the effects of  
720 extended training and then the inclusion of punishment for incorrect sequences. Using this  
721 refined protocol, we then conducted three experiments in separate cohorts of rats examining  
722 the effect of pre-training lesions of the (1) DMS and DLS; (2) mOFC and IOFC; and (3) PrL  
723 and IL on acquisition of action sequencing. Methods were the same across these experiments,  
724 with exceptions detailed below.

725 *Animals and Housing*

726 Adult male Lister-hooded rats weighing 280-300g (Charles River, UK) were housed  
727 in groups of four on reversed 12-h light cycle (off at 07:00) within a temperature (21°C) and  
728 humidity-controlled environment in open top cages with aspen bedding, wood block and  
729 tube. A week after arriving, rats were food-restricted to no less than 90% of free-feeding  
730 weight with unrestricted access to water and were exposed to reward pellets. All procedures  
731 were conducted in accordance with the United Kingdom Animal (Scientific Procedures) Act  
732 of 1986 and were approved by ethical review at the University of Cambridge.

733

734 **METHOD DETAILS**

735 *Apparatus*

736 Rats were trained to perform a five-step sequential nose poke task (SNT), which was  
737 adapted from Keeler, Pretsell, and Robbins (2014), however with substantial changes  
738 including absence of cues and the number and order of responses. The task was conducted in  
739 operant chambers (Campden Instruments, UK) with five nose poke apertures available within  
740 a horizontal array and a reward receptacle on the opposing wall (Robbins, 2002). Nose pokes  
741 and the reward receptacle were fitted with infra-red beams to detect head entries and a light  
742 for illumination. Reward sucrose pellets (AIN76A, 45mg; TestDiet, UK) were delivered into  
743 the receptacle by a pellet dispenser. A house light was mounted on the ceiling and the  
744 chamber was contained within a sound attenuating box. Overhead cameras  
745 (SpyCameraCCTV, UK) were mounted above each chamber to monitor and record behavior  
746 remotely. Whisker Server software and custom programming software was used to operate  
747 the chambers and record responses (Cardinal & Aitken, 2010; Keeler et al., 2014).

748 *Sequential Nose poke Task (SNT) Protocol*

749           The SNT requires rats to make a nose poke response into each of the five holes from  
750 left to right across a horizontal array to receive a food reward. Sessions ran for 30 min unless  
751 stated otherwise and all nose pokes and head entries were recorded with the duration of each  
752 nose poke calculated based on the entry and exit times. Rats were first habituated to the  
753 chambers and retrieved rewards from the receptacle that were dispensed with each head entry  
754 until 100 were collected (stage 1). Next, rats were trained to make nose poke responses into  
755 the five-hole array (stage 2). Each hole in the five-step sequence was illuminated for 1 s  
756 before moving to the next location from left to right and finishing with reward delivery (e.g.  
757 1-2-3-4-5-Reward), which was signalled by illumination of the receptacle. Head entry into  
758 the receptacle triggered the start of the next trial. Critically, when the rat nose poked an  
759 illuminated hole, the light and sequence counter immediately moved on to the next hole,  
760 allowing the rat to achieve reward delivery faster than if they did not nose poke. If the rat  
761 made a nose poke into an alternative hole, the illuminated hole would flash for the duration of  
762 the incorrect nose poke to draw attention to the correct location. To further encourage nose  
763 poking, the illumination duration incremented by 10% of the original delay (1 s) each trial,  
764 further delaying reward delivery if nose pokes were not made. This training protocol was  
765 implemented to reduce bias for the start or end elements (inherent to training by chaining)  
766 and rapidly produced sequencing behavior. Once rats were successfully able to complete at  
767 least 15 sequences within a session, they moved to stage 3 where the illumination sequence  
768 only advanced to the next hole, and ultimately to reward delivery, after a correct nose poke  
769 response into an illuminated hole. Criteria for stage 3 was 50 complete sequences, which was  
770 typically achieved in a single session. Stage 4 was identical to stage 3, except that now the  
771 nose poke holes were no longer illuminated. After each of the holes had been poked in order,  
772 a reward was delivered. Incorrect nose pokes were recorded, but not punished. After reaching  
773 50 uncued sequences, they were moved to the final level (stage 5) where incorrect nose pokes  
774 were punished with a 5 s time out period signalled by the illumination of the house light.  
775 After the time out ended, the rat was required to start the sequence again from hole 1.  
776 Responses during the timeout period were recorded but did not extend the time out duration.  
777 Testing on stage 5 was conducted for 15 sessions and rats began immediately after reaching  
778 training criteria. Key measures included trials initiated, correct sequences, incorrect  
779 sequences, nose poke durations at each location and total sequence duration.  
780

781 **Table 1. Summary of training stages and criteria to move to the next stage.**

| Stage   | Summary                   | Criteria                  | Av. Sessions |
|---------|---------------------------|---------------------------|--------------|
| Stage 1 | Habituation to chamber    | 100 pellets x 1 session   | 1            |
| Stage 2 | Start nose poking 5 holes | >15 sequences x 1 session | 7            |
| Stage 3 | Cued sequence – must NP   | >50 sequences x 1 session | 1            |
| Stage 4 | No cues                   | >50 sequences x 1 session | 3            |
| Stage 5 | Incorrect = Time Out      | Final stage               | 15           |

782

783 **Table 2. Behavioral measures used to quantify action sequencing.**

|                           |                                                    |
|---------------------------|----------------------------------------------------|
| Trials                    | Total number of trials initiated                   |
| Correct                   | Number of completed sequences                      |
| Incorrect                 | Number of incorrect sequences                      |
| Sequence Duration         | NP entry at NP1 to exit on NP5                     |
| NP Duration               | Time from entry to exit of correct nose poke       |
| Inter-Poke Interval (IPI) | Time from exit of previous NP to entry of next NP  |
| Initiation Latency        | Time from exit magazine to entry NP1 of next trial |
| Reward Latency            | Time from exit NP5 to magazine entry when correct  |

784

785 *Task development*

786 During task development we originally only trained to stage 4. Rats were then split  
 787 into two groups (n=12) with one group continuing with daily training sessions (morning  
 788 only), while the extended group moved to twice daily sessions (morning and afternoon) for  
 789 10 days. Sensitivity to outcome-specific devaluation was then tested. As this did not result in  
 790 habitual action sequencing, rats were then reallocated (matched for prior training history) to  
 791 either continue daily training sessions at stage 4 (flexible group) or were moved to stage 5  
 792 (invariant group) where incorrect sequences were punished for 15 sessions. Rats then  
 793 underwent outcome-specific devaluation testing.

794 *Outcome-specific devaluation*

795 Rats were familiarised to the grain pellets in their home cage prior to devaluation  
 796 testing. Individuals were placed in empty wire-top cages with free access to 25g of either  
 797 grain or sucrose pellets for 30 min before being placed into the operant chambers for a 10

798 min test in extinction. Rats were given two standard training sessions to recover high  
799 response rates before being tested with the alternative outcome.

#### 800 *Surgery*

801         Prior to training rats were randomly assigned to receive either sham surgery or  
802 intracranial bilateral lesions to the region of interest under 2-3% isoflurane anaesthesia with  
803 local application of bupivacaine (2mg/kg s.c. at 0.8ml/kg; Sigma) at the incision site. Fibre-  
804 sparing lesions were induced by quinolinic acid (0.09M in PBS, Sigma Aldrich, UK) or  
805 phosphate-buffered saline (PBS) sham infusions at 0.1ml/min using the co-ordinates in Table  
806 3 relative to bregma based on Paxinos and Watson (2005). Rats were treated with Metacam  
807 (1mg/kg; Boehringer Ingelheim) pre- and post-operatively and rehoused in groups of four  
808 after lesion surgery. After at least 7 days recovery, rats were food restricted and began  
809 operant training as described above.

810



811 **Table 3. Co-ordinates and volumes used for pre-training lesion infusions of quinolinic**  
812 **acid.** *DMS: dorsomedial striatum; DLS: dorsolateral striatum; PrL: prelimbic cortex; IL:*  
813 *infralimbic cortex; mOFC: medial orbitofrontal cortex; IOFC: lateral orbitofrontal cortex;*  
814 *ant: anterior; post: posterior.*

| Region   | AP   | ML   | DV              | Vol (ml) |
|----------|------|------|-----------------|----------|
| DMS      | -0.4 | +2.2 | -4.5<br>(skull) | 0.3      |
| DLS      | +0.7 | +3.6 | -5.0<br>(skull) | 0.3      |
| PrL ant  | +3.5 | +0.7 | -2.5 (dura)     | 0.3      |
| PrL post | +2.8 | +0.7 | -2.8 (dura)     | 0.3      |
| IL ant   | +2.9 | +0.7 | -4.0 (dura)     | 0.2      |
| IL post  | +2.5 | +0.7 | -4.0 (dura)     | 0.2      |
| mOFC     | +4.0 | +0.6 | -3.3 (dura)     | 0.3      |
| IOFC     | +3.5 | +2.5 | -3.6 (dura)     | 0.3      |

815

#### 816 *Locomotion*

817 After completion of operant testing, rats were tested for 30 min in an open field arena  
818 to rule out gross locomotor impairments. Testing was conducted in lidded boxes (48 x 26.5 x  
819 21cm, Techniplast, UK) in a quiet room with dim red lighting. Locomotion was recorded by  
820 infra-red beams across the arena (Photobeam Activity System, San Diego Instruments).

#### 821 *Histology*

822 Rats were transcardially perfused using 0.01M PBS with 5g/L sodium nitrite followed  
823 by 4% formaldehyde. Brains were then removed for storage in 4% formaldehyde at room  
824 temperature overnight on a shaker. They were then transferred to 30% sucrose until they sank  
825 before being rapidly frozen and cut into 60mm sections on a freezing microtome (Leica).  
826 Sections were stained for NeuN to confirm lesion placement.

#### 827 *NeuN protocol*

828 Sections were washed in 0.01M PBS and then placed in primary antibody (NeuN  
829 monoclonal mouse anti-neuronal nuclear protein, Millipore MAB377, 1:2000 in 0.4% Triton  
830 X-100 in 0.01M PBS) for two hours on a rotary shaker. Sections are washed three times in  
831 0.01M PBS over 30 min, then secondary (biotinylated anti-mouse IgG, Vector Laboratories  
832 BA-2001, at 1:200 in 0.4% Triton X-100 in 0.01M PBS) applied for 90 min. Sections were

833 washed three times in 0.01M PBS, before applying aN immunoperoxidase procedure  
834 (Vectastain ABC Kit, Vector Laboratories). Sections were washed three times in 0.01M PBS  
835 before visualising in DAB (ImmPACT DAB Peroxidase (HRP) Substrate, Vector  
836 Laboratories) and stopping reaction with cold 0.01M PBS. Sections were mounted on gelatin  
837 coated slides and dried before clearing with 100% ethanol (2 min), then 50% Ethanol/50%  
838 xylene (2 min) and 100% xylene before cover slipping with DPX mountant (Sigma). Images  
839 were captured using a NanoZoomer digital slide scanner and visualised with the NDP.view  
840 software (Hamamatsu) for histological verification of lesion placement.

841

## 842 **QUANTIFICATION AND STATISTICAL ANALYSIS**

### 843 *Statistical Analysis*

844 Rats were excluded for inaccurate or insufficient lesion placement or if they failed to  
845 perform action sequences (>20 sessions of training). Final group sizes are reported in the  
846 figure legends for each group. Acquisition data was collected over 15 sessions and averaged  
847 across blocks of three sessions leading to five blocks. Sequence duration was calculated from  
848 the onset of nose poke 1 to the offset of nose poke 5, while the nose poke duration was  
849 calculated from entry to exit at each hole. The median and standard deviation for each rat on  
850 each day was calculated from individual response times. Timing data was not stored by the  
851 program for four rats in one session and therefore their times were averaged across two  
852 sessions rather than three for that block to prevent exclusion from the entire dataset. Where  
853 appropriate we applied paired t-tests, univariate or repeated measures ANOVA, with simple  
854 effects used in the case of significant interactions or post hoc comparisons for effects  
855 between treatment groups (SPSS v.25, IBM). Greenhouse-Geisser corrections were made if  
856 the sphericity assumption was violated and epsilon was <0.75.

857 SUPPLEMENTARY FIGURES

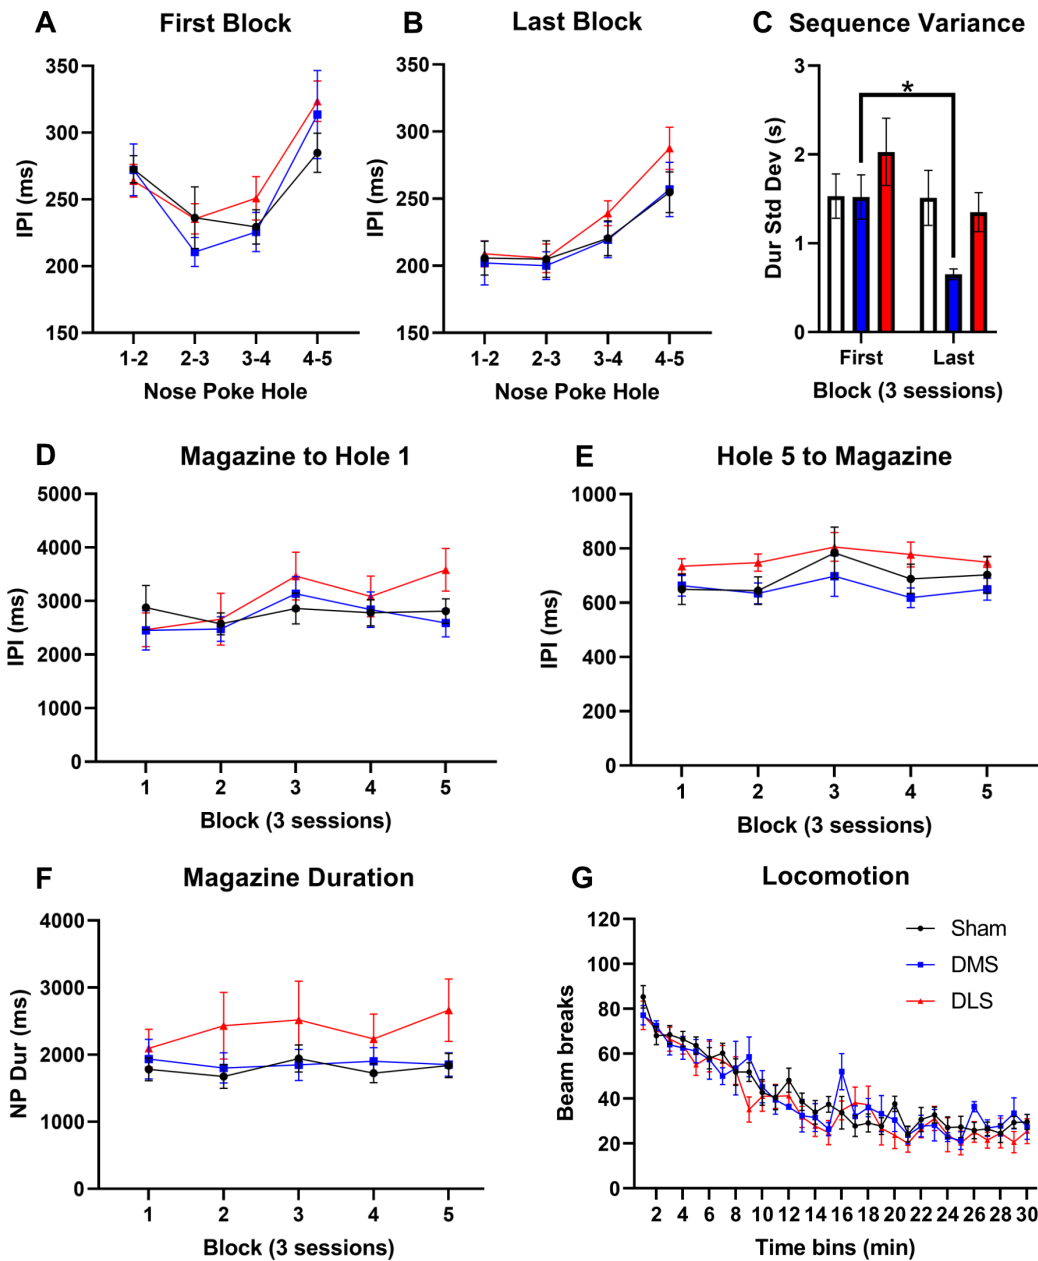

858

859 **Supplementary Figure 1. Additional sequencing measures in DMS and DLS lesioned**

860 **rats.**

861 (A) Groups did not differ in the inter-poke interval (IPI) between holes on the first block;

862 sham (open, n=11), DMS lesioned (blue, n=7), DLS lesioned (red, n=8).

863 (B) This remained the case on the last block of acquisition with IPI's becoming faster

864 with training (Block:  $F_{4, 48}=15.62$ ,  $p<0.001$ ).

865 (C) There was a significant reduction in the standard deviation of sequence durations,

866 indicating reduced variation with training in the DMS-lesioned rats but not in sham or

867 DLS-lesioned rats (sham:  $t_{10}=0.06$ ,  $p=0.953$ ; DMS:  $t_6=3.09$ ,  $p=0.021$ ; DLS:  $t_7=1.57$ ,  
868  $p=0.160$ ).

869 (D) The interval between leaving the magazine and nose poking into hole 1 did not differ  
870 between groups across acquisition ( $F_{2,23}=0.49$ ,  $p=0.62$ ).

871 (E) Nor did the interval from the fifth hole of the sequence and magazine entry (reward  
872 collection latency; Block  $F_{4,92}=1.91$ ,  $p=0.16$ ; Lesion  $F_{2,23}=1.46$ ,  $p=0.25$ ).

873 (F) The time spent with their nose in the magazine also did not significantly differ  
874 between groups (Block,  $F_{4,92}=1.23$ ,  $p=0.30$ ; Lesion,  $F_{2,23}=1.47$ ,  $p=0.25$ ).

875 (G) There was a main effect of time on locomotor activity, but no effect of treatment  
876 ( $p>0.4$ ).

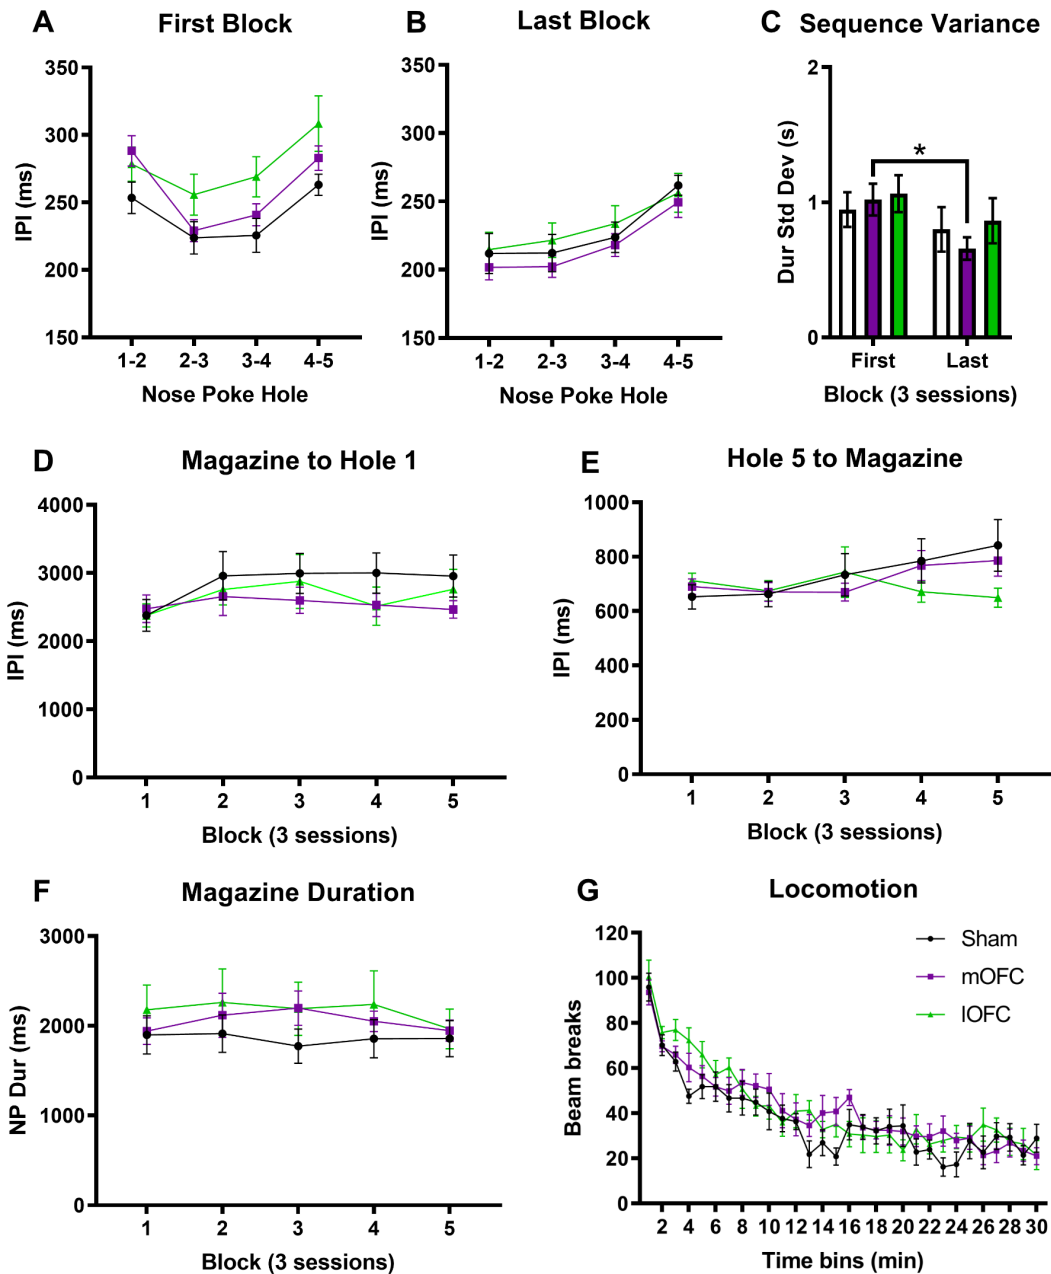

877

878 **Supplementary Figure 2. Additional sequencing measures in mOFC and IOFC lesioned**

879 **rats.**

880 (A) Groups did not differ in the inter-poke interval (IPI) between holes on the first block;  
881 sham (open, n=10), mOFC (purple, n=8) or IOFC (green, n=12).

882 (B) This remained the case on the last block of acquisition with IPI's becoming faster  
883 with training. However, a significant Block X Lesion interaction highlighted that the  
884 lesion groups showed greater reduction in IPI times across acquisition due to the  
885 relatively slower IPI times in the first block (Block:  $F_{1, 27}=55.0, p<0.001$ ; Lesion:  $F_{12}$   
886  $_{27}=1.21, p=0.31$ ; Block X Lesion:  $F_{2, 27}=4.34, p=0.023$ ; Hole and Hole X Block:  
887  $p<0.001$ ; Hole X Lesion  $p>0.5$ ; Hole X Block X Lesion:  $F_{6, 51}=2.36, p=0.068$ ).

- 888 (C) There was a significant reduction in the standard deviation of sequence durations,  
889 indicating reduced variation with training in the mOFC-lesioned rats but not in sham  
890 or IOFC-lesioned rats (sham:  $t_7=0.67$ ,  $p=0.53$ ; mOFC:  $t_{11}=2.53$ ,  $p=0.028$ ; IOFC:  
891  $t_9=1.31$ ,  $p=0.22$ ).
- 892 (D) The interval between leaving the magazine and nose poking into hole 1 did not differ  
893 between groups across acquisition.
- 894 (E) Nor did the interval from the fifth hole of the sequence and magazine entry (reward  
895 collection latency; Block:  $F_{2,57}=2.95$ ,  $p=0.06$ ; Lesion:  $F_{2,27}=0.26$ ,  $p=0.77$ ; Block X  
896 Lesion:  $F_{4,57}=2.35$ ,  $p=0.06$ ).
- 897 (F) The time spent with their nose in the magazine also did not significantly differ  
898 between groups (Block:  $F_{3,75}=1.07$ ,  $p=0.37$ ; Lesion:  $F_{2,27}=0.46$ ,  $p=0.64$ ; Block X  
899 Lesion:  $F_{6,75}=0.66$ ,  $p=0.67$ ).
- 900 (G) There was a main effect of time on locomotor activity, but no effect of treatment  
901 ( $p>0.4$ ).

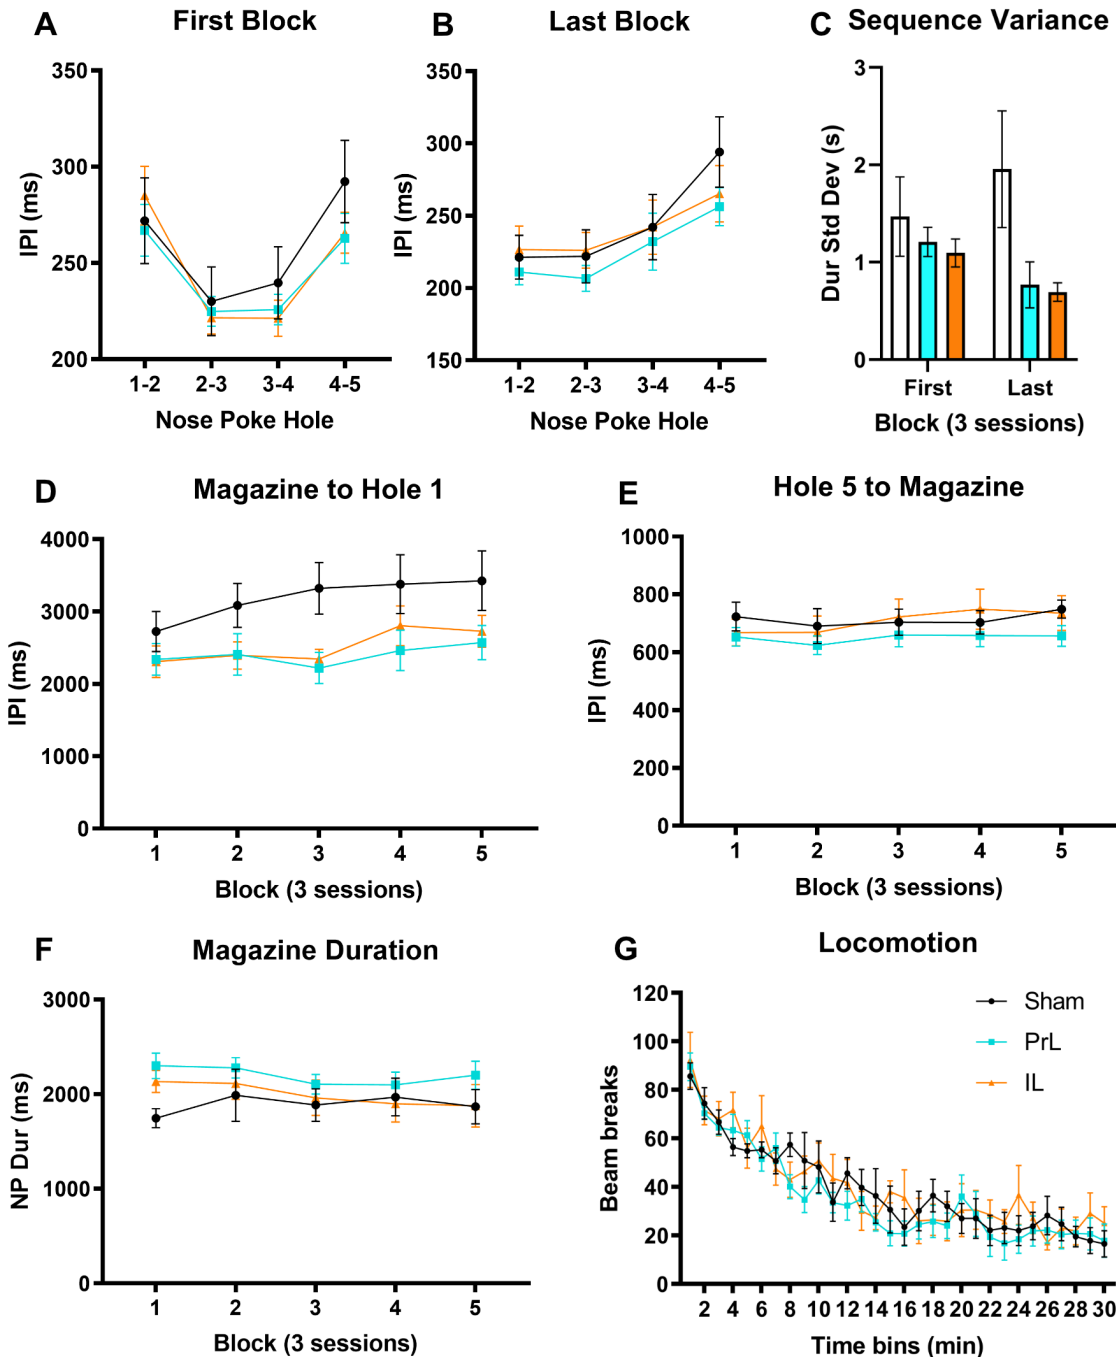

902

903

**Supplementary Figure 3. Additional sequencing measures in PrL and IL lesioned rats.**

904

(A) Groups did not differ in the inter-poke interval (IPI) between holes on the first block; sham (open, n=9), PrL (cyan, n=9) or IL (orange, n=7).

905

sham (open, n=9), PrL (cyan, n=9) or IL (orange, n=7).

906

(B) This remained the case on the last block of acquisition.

907

(C) There was a trend towards a reduction in the standard deviation of sequence durations

908

in the IL-lesioned rats but not in sham or PrL-lesioned rats (sham:  $t_8=-0.66$ ,  $p=0.53$ ;

909

PrL:  $t_8=1.61$ ,  $p=0.15$ ; IL:  $t_6=2.45$ ,  $p=0.050$ ). It was noted that two sham rats had rare

910

but excessively long sequence durations, perhaps due to stopping and starting

911

sequencing. Typically, rats would subsequently make an incorrect response if they

912 paused, however here they were still able to complete a correct sequence and that  
913 data is captured in the large error bars for sham rat within both blocks.

914 (D) The effect of lesion on the interval between the magazine and hole 1 neared  
915 significance with the sham rats taking longer than the lesioned groups (Block:  
916  $F_{2,52}=3.17$ ,  $p=0.043$ ; Lesion:  $F_{2,22}=3.34$ ,  $p=0.054$ ; Block X Lesion:  $F_{5,52}=0.70$ ,  
917  $p=0.61$ ).

918 (E) Nor did the interval from the fifth hole of the sequence and magazine entry (reward  
919 collection latency; Block:  $F_{2,51}=2.69$ ,  $p=0.07$ ; Lesion:  $F_{2,22}=0.73$ ,  $p=0.49$ ; Block X  
920 Lesion:  $F_{5,51}=0.96$ ,  $p=0.45$ ).

921 (F) The time spent with their nose in the magazine also did not significantly differ  
922 between groups.

923 (G) There was a main effect of time on locomotor activity, but no effect of treatment  
924 ( $p>0.4$ ).



## 925 REFERENCES

- 926 Abrahamse, E. L., Ruitenberg, M. F., de Kleine, E., & Verwey, W. B. (2013). Control of  
927 automated behavior: insights from the discrete sequence production task. *Front*  
928 *Hum Neurosci*, 7, 82. doi:10.3389/fnhum.2013.00082
- 929 Agostino, R., Berardelli, A., Formica, A., Accornero, N., & Manfredi, M. (1992). Sequential  
930 arm movements in patients with Parkinson's disease, Huntington's disease and  
931 dystonia. *Brain*, 115 ( Pt 5), 1481-1495. doi:10.1093/brain/115.5.1481
- 932 Ashby, F. G., Turner, B. O., & Horvitz, J. C. (2010). Cortical and basal ganglia contributions to  
933 habit learning and automaticity. *Trends Cogn Sci*, 14(5), 208-215.  
934 doi:10.1016/j.tics.2010.02.001
- 935 Balleine, B. W. (2019). The Meaning of Behavior: Discriminating Reflex and Volition in the  
936 Brain. *Neuron*, 104(1), 47-62. doi:10.1016/j.neuron.2019.09.024
- 937 Balleine, B. W., & Dezfouli, A. (2019). Hierarchical Action Control: Adaptive Collaboration  
938 Between Actions and Habits. *Front Psychol*, 10, 2735. doi:10.3389/fpsyg.2019.02735
- 939 Balleine, B. W., Liljeholm, M., & Ostlund, S. B. (2009). The integrative function of the basal  
940 ganglia in instrumental conditioning. *Behav Brain Res*, 199(1), 43-52.  
941 doi:10.1016/j.bbr.2008.10.034
- 942 Bassett, D. S., Yang, M., Wymbs, N. F., & Grafton, S. T. (2015). Learning-induced autonomy  
943 of sensorimotor systems. *Nat Neurosci*, 18(5), 744-751. doi:10.1038/nn.3993
- 944 Bergstrom, H. C., Lipkin, A. M., Lieberman, A. G., Pinard, C. R., Gunduz-Cinar, O., Brockway,  
945 E. T., . . . Holmes, A. (2018). Dorsolateral Striatum Engagement Interferes with Early  
946 Discrimination Learning. *Cell Rep*, 23(8), 2264-2272.  
947 doi:10.1016/j.celrep.2018.04.081
- 948 Bradfield, L. A., & Balleine, B. W. (2013). Hierarchical and binary associations compete for  
949 behavioral control during instrumental biconditional discrimination. *J Exp Psychol*  
950 *Anim Behav Process*, 39(1), 2-13. doi:10.1037/a0030941
- 951 Bradfield, L. A., Dezfouli, A., van Holstein, M., Chieng, B., & Balleine, B. W. (2015). Medial  
952 Orbitofrontal Cortex Mediates Outcome Retrieval in Partially Observable Task  
953 Situations. *Neuron*, 88(6), 1268-1280. doi:10.1016/j.neuron.2015.10.044
- 954 Bradfield, L. A., Hart, G., & Balleine, B. W. (2018). Inferring action-dependent outcome  
955 representations depends on anterior but not posterior medial orbitofrontal cortex.  
956 *Neurobiol Learn Mem*, 155, 463-473. doi:10.1016/j.nlm.2018.09.008
- 957 Burguiere, E., Monteiro, P., Feng, G., & Graybiel, A. M. (2013). Optogenetic stimulation of  
958 lateral orbitofronto-striatal pathway suppresses compulsive behaviors. *Science*,  
959 340(6137), 1243-1246. doi:10.1126/science.1232380
- 960 Cardinal, R. N., & Aitken, M. R. (2010). Whisker: a client-server high-performance  
961 multimedia research control system. *Behavior Research Methods*, 42(4), 1059-1071.  
962 doi:10.3758/BRM.42.4.1059
- 963 Carli, M., Robbins, T. W., Evenden, J. L., & Everitt, B. J. (1983). Effects of lesions to ascending  
964 noradrenergic neurones on performance of a 5-choice serial reaction task in rats;  
965 implications for theories of dorsal noradrenergic bundle function based on selective  
966 attention and arousal. *Behav Brain Res*, 9(3), 361-380. Retrieved from  
967 <https://www.ncbi.nlm.nih.gov/pubmed/6639741>
- 968 Chudasama, Y., & Robbins, T. W. (2003). Dissociable contributions of the orbitofrontal and  
969 infralimbic cortex to pavlovian autoshaping and discrimination reversal learning:  
970 further evidence for the functional heterogeneity of the rodent frontal cortex. *J*

- 971 *Neurosci*, 23(25), 8771-8780. Retrieved from  
972 <https://www.ncbi.nlm.nih.gov/pubmed/14507977>
- 973 Corbit, L. H., & Balleine, B. W. (2003). The role of prelimbic cortex in instrumental  
974 conditioning. *Behav Brain Res*, 146(1-2), 145-157. doi:10.1016/j.bbr.2003.09.023
- 975 Coutureau, E., & Killcross, S. (2003). Inactivation of the infralimbic prefrontal cortex  
976 reinstates goal-directed responding in overtrained rats. *Behav Brain Res*, 146(1-2),  
977 167-174. doi:10.1016/j.bbr.2003.09.025
- 978 Cui, G., Jun, S. B., Jin, X., Pham, M. D., Vogel, S. S., Lovinger, D. M., & Costa, R. M. (2013).  
979 Concurrent activation of striatal direct and indirect pathways during action initiation.  
980 *Nature*, 494(7436), 238-242. doi:10.1038/nature11846
- 981 Daw, N. D., Niv, Y., & Dayan, P. (2005). Uncertainty-based competition between prefrontal  
982 and dorsolateral striatal systems for behavioral control. *Nat Neurosci*, 8(12), 1704-  
983 1711. doi:10.1038/nn1560
- 984 de Wit, S., Kindt, M., Knot, S. L., Verhoeven, A. A. C., Robbins, T. W., Gasull-Camos, J., . . .  
985 Gillan, C. M. (2018). Shifting the balance between goals and habits: Five failures in  
986 experimental habit induction. *J Exp Psychol Gen*, 147(7), 1043-1065.  
987 doi:10.1037/xge0000402
- 988 Dezfouli, A., & Balleine, B. W. (2012). Habits, action sequences and reinforcement learning.  
989 *Eur J Neurosci*, 35(7), 1036-1051. doi:10.1111/j.1460-9568.2012.08050.x
- 990 Dezfouli, A., Lingawi, N. W., & Balleine, B. W. (2014). Habits as action sequences:  
991 hierarchical action control and changes in outcome value. *Philos Trans R Soc Lond B*  
992 *Biol Sci*, 369(1655). doi:10.1098/rstb.2013.0482
- 993 Dhawale, A. K., Wolff, S. B. E., Ko, R., & O'Leary, B. P. (2021). The basal ganglia control the  
994 detailed kinematics of learned motor skills. *Nat Neurosci*. doi:10.1038/s41593-021-  
995 00889-3
- 996 Dickinson, A. (1985). Actions and habits-the development of behavioural autonomy. *Philos*  
997 *Trans R Soc Lond B Biol Sci*, 308, 67-78.
- 998 Drummond, N., & Niv, Y. (2020). Model-based decision making and model-free learning.  
999 *Curr Biol*, 30(15), R860-R865. doi:10.1016/j.cub.2020.06.051
- 1000 Garr, E., & Delamater, A. R. (2019). Exploring the relationship between actions, habits, and  
1001 automaticity in an action sequence task. *Learn Mem*, 26(4), 128-132.  
1002 doi:10.1101/lm.048645.118
- 1003 Geddes, C. E., Li, H., & Jin, X. (2018). Optogenetic Editing Reveals the Hierarchical  
1004 Organization of Learned Action Sequences. *Cell*, 174(1), 32-43 e15.  
1005 doi:10.1016/j.cell.2018.06.012
- 1006 Graybiel, A. M., & Grafton, S. T. (2015). The striatum: where skills and habits meet. *Cold*  
1007 *Spring Harbor Perspectives in Biology*, 7(8), a021691.  
1008 doi:10.1101/cshperspect.a021691
- 1009 Gremel, C. M., Chancey, J. H., Atwood, B. K., Luo, G., Neve, R., Ramakrishnan, C., . . . Costa,  
1010 R. M. (2016). Endocannabinoid Modulation of Orbitostriatal Circuits Gates Habit  
1011 Formation. *Neuron*, 90(6), 1312-1324. doi:10.1016/j.neuron.2016.04.043
- 1012 Gremel, C. M., & Costa, R. M. (2013). Orbitofrontal and striatal circuits dynamically encode  
1013 the shift between goal-directed and habitual actions. *Nature Communications*, 4,  
1014 2264. doi:10.1038/ncomms3264
- 1015 Haddon, J. E., & Killcross, S. (2011). Inactivation of the infralimbic prefrontal cortex in rats  
1016 reduces the influence of inappropriate habitual responding in a response-conflict  
1017 task. *Neuroscience*, 199(0), 205-212. doi:10.1016/j.neuroscience.2011.09.065

- 1018 Hardwick, R. M., Forrence, A. D., Krakauer, J. W., & Haith, A. M. (2019). Time-dependent  
1019 competition between goal-directed and habitual response preparation. *Nat Hum*  
1020 *Behav*, 3(12), 1252-1262. doi:10.1038/s41562-019-0725-0
- 1021 Hart, G., Bradfield, L. A., Fok, S. Y., Chieng, B., & Balleine, B. W. (2018). The Bilateral  
1022 Prefronto-striatal Pathway Is Necessary for Learning New Goal-Directed Actions. *Curr*  
1023 *Biol*, 28(14), 2218-2229 e2217. doi:10.1016/j.cub.2018.05.028
- 1024 Hart, G., Leung, B. K., & Balleine, B. W. (2014). Dorsal and ventral streams: the distinct role  
1025 of striatal subregions in the acquisition and performance of goal-directed actions.  
1026 *Neurobiol Learn Mem*, 108, 104-118. doi:10.1016/j.nlm.2013.11.003
- 1027 Heilbronner, S. R., Rodriguez-Romaguera, J., Quirk, G. J., Groenewegen, H. J., & Haber, S. N.  
1028 (2016). Circuit-Based Corticostriatal Homologies Between Rat and Primate. *Biol*  
1029 *Psychiatry*, 80(7), 509-521. doi:10.1016/j.biopsych.2016.05.012
- 1030 Hervig, M. E., Fiddian, L., Piilgaard, L., Bozic, T., Blanco-Pozo, M., Knudsen, C., . . . Robbins, T.  
1031 W. (2019). Dissociable and Paradoxical Roles of Rat Medial and Lateral Orbitofrontal  
1032 Cortex in Visual Serial Reversal Learning. *Cereb Cortex*. doi:10.1093/cercor/bhz144
- 1033 Hilario, M., Holloway, T., Jin, X., & Costa, R. M. (2012). Different dorsal striatum circuits  
1034 mediate action discrimination and action generalization. *Eur J Neurosci*, 35(7), 1105-  
1035 1114. doi:10.1111/j.1460-9568.2012.08073.x
- 1036 Izquierdo, A. (2017). Functional Heterogeneity within Rat Orbitofrontal Cortex in Reward  
1037 Learning and Decision Making. *J Neurosci*, 37(44), 10529-10540.  
1038 doi:10.1523/JNEUROSCI.1678-17.2017
- 1039 Jin, X., & Costa, R. M. (2010). Start/stop signals emerge in nigrostriatal circuits during  
1040 sequence learning. *Nature*, 466(7305), 457-462. doi:10.1038/nature09263
- 1041 Jin, X., & Costa, R. M. (2015). Shaping action sequences in basal ganglia circuits. *Curr Opin*  
1042 *Neurobiol*, 33, 188-196. doi:10.1016/j.conb.2015.06.011
- 1043 Jin, X., Tecuapetla, F., & Costa, R. M. (2014). Basal ganglia subcircuits distinctively encode  
1044 the parsing and concatenation of action sequences. *Nat Neurosci*, 17(3), 423-430.  
1045 doi:10.1038/nn.3632
- 1046 Keeler, J. F., Pretsell, D. O., & Robbins, T. W. (2014). Functional implications of dopamine D1  
1047 vs. D2 receptors: A 'prepare and select' model of the striatal direct vs. indirect  
1048 pathways. *Neuroscience*, 282, 156-175. doi:10.1016/j.neuroscience.2014.07.021
- 1049 Killcross, S., & Coutureau, E. (2003). Coordination of actions and habits in the medial  
1050 prefrontal cortex of rats. *Cereb Cortex*, 13(4), 400-408. doi:10.1093/cercor/13.4.400
- 1051 Kupferschmidt, D. A., Juczewski, K., Cui, G., Johnson, K. A., & Lovinger, D. M. (2017). Parallel,  
1052 but Dissociable, Processing in Discrete Corticostriatal Inputs Encodes Skill Learning.  
1053 *Neuron*, 96(2), 476-489 e475. doi:10.1016/j.neuron.2017.09.040
- 1054 Lehericy, S., Benali, H., Van de Moortele, P. F., Pelegrini-Issac, M., Waechter, T., Ugurbil, K.,  
1055 & Doyon, J. (2005). Distinct basal ganglia territories are engaged in early and  
1056 advanced motor sequence learning. *Proc Natl Acad Sci U S A*, 102(35), 12566-12571.  
1057 doi:10.1073/pnas.0502762102
- 1058 Maily, P., Aliane, V., Groenewegen, H. J., Haber, S. N., & Deniau, J. M. (2013). The rat  
1059 prefrontostriatal system analyzed in 3D: evidence for multiple interacting functional  
1060 units. *J Neurosci*, 33(13), 5718-5727. doi:10.1523/JNEUROSCI.5248-12.2013
- 1061 Miyachi, S., Hikosaka, O., & Lu, X. (2002). Differential activation of monkey striatal neurons  
1062 in the early and late stages of procedural learning. *Exp Brain Res*, 146(1), 122-126.  
1063 doi:10.1007/s00221-002-1213-7

- 1064 Moussa, R., Poucet, B., Amalric, M., & Sargolini, F. (2011). Contributions of dorsal striatal  
1065 subregions to spatial alternation behavior. *Learn Mem*, *18*(7), 444-451.  
1066 doi:10.1101/lm.2123811
- 1067 Noonan, M. P., Chau, B. K. H., Rushworth, M. F. S., & Fellows, L. K. (2017). Contrasting  
1068 Effects of Medial and Lateral Orbitofrontal Cortex Lesions on Credit Assignment and  
1069 Decision-Making in Humans. *J Neurosci*, *37*(29), 7023-7035.  
1070 doi:10.1523/JNEUROSCI.0692-17.2017
- 1071 Ostlund, S. B., & Balleine, B. W. (2007). Orbitofrontal cortex mediates outcome encoding in  
1072 Pavlovian but not instrumental conditioning. *J Neurosci*, *27*(18), 4819-4825.  
1073 doi:10.1523/JNEUROSCI.5443-06.2007
- 1074 Ostlund, S. B., Winterbauer, N. E., & Balleine, B. W. (2009). Evidence of action sequence  
1075 chunking in goal-directed instrumental conditioning and its dependence on the  
1076 dorsomedial prefrontal cortex. *J Neurosci*, *29*(25), 8280-8287.  
1077 doi:10.1523/JNEUROSCI.1176-09.2009
- 1078 Panayi, M. C., & Killcross, S. (2014). Orbitofrontal cortex inactivation impairs between- but  
1079 not within-session Pavlovian extinction: an associative analysis. *Neurobiol Learn  
1080 Mem*, *108*, 78-87. doi:10.1016/j.nlm.2013.08.002
- 1081 Paxinos, G., & Watson, C. (2005). *The Rat Brain in Stereotaxic Coordinates* (5th ed.). San  
1082 Diego: Academic Press.
- 1083 Peak, J., Hart, G., & Balleine, B. W. (2019). From learning to action: the integration of dorsal  
1084 striatal input and output pathways in instrumental conditioning. *Eur J Neurosci*,  
1085 *49*(5), 658-671. doi:10.1111/ejn.13964
- 1086 Perez, O. D., & Dickinson, A. (2020). A theory of actions and habits: The interaction of rate  
1087 correlation and contiguity systems in free-operant behavior. *Psychological Review*,  
1088 *127*(6), 945-971. doi:10.1037/rev0000201
- 1089 Pool, E., Gera, R., Fransen, A., Perez, O. D., Cremer, A., Aleksic, M., . . . O'Doherty, J. P.  
1090 (2021). Determining the Effects of Training Duration on the Behavioral Expression of  
1091 Habitual Control in Humans: A Multi-laboratory Investigati.  
1092 doi:10.31234/osf.io/z756h
- 1093 Robbins, T. W. (2002). The 5-choice serial reaction time task: behavioural pharmacology and  
1094 functional neurochemistry. *Psychopharmacology (Berl)*, *163*(3-4), 362-380.  
1095 doi:10.1007/s00213-002-1154-7
- 1096 Robbins, T. W., & Costa, R. M. (2017). Habits. *Curr Biol*, *27*(22), R1200-R1206.  
1097 doi:10.1016/j.cub.2017.09.060
- 1098 Schreiner, D. C., Renteria, R., & Gremel, C. M. (2020). Fractionating the all-or-nothing  
1099 definition of goal-directed and habitual decision-making. *J Neurosci Res*, *98*(6), 998-  
1100 1006. doi:10.1002/jnr.24545
- 1101 Shipman, M. L., Trask, S., Bouton, M. E., & Green, J. T. (2018). Inactivation of prelimbic and  
1102 infralimbic cortex respectively affects minimally-trained and extensively-trained  
1103 goal-directed actions. *Neurobiol Learn Mem*, *155*, 164-172.  
1104 doi:10.1016/j.nlm.2018.07.010
- 1105 Shobe, J. L., Bakhurin, K. I., Claar, L. D., & Masmanidis, S. C. (2017). Selective Modulation of  
1106 Orbitofrontal Network Activity during Negative Occasion Setting. *J Neurosci*, *37*(39),  
1107 9415-9423. doi:10.1523/JNEUROSCI.0572-17.2017
- 1108 Smith, A. C. W., Jonkman, S., Difeliceantonio, A. G., O'Connor, R. M., Ghoshal, S., Romano,  
1109 M. F., . . . Kenny, P. J. (2021). Opposing roles for striatonigral and striatopallidal

- 1110 neurons in dorsolateral striatum in consolidating new instrumental actions. *Nature*  
1111 *Communications*, 12(1), 5121. doi:10.1038/s41467-021-25460-3
- 1112 Smith, K. S., & Graybiel, A. M. (2013). A dual operator view of habitual behavior reflecting  
1113 cortical and striatal dynamics. *Neuron*, 79(2), 361-374.  
1114 doi:10.1016/j.neuron.2013.05.038
- 1115 Smith, K. S., & Graybiel, A. M. (2016). Habit formation coincides with shifts in reinforcement  
1116 representations in the sensorimotor striatum. *J Neurophysiol*, 115(3), 1487-1498.  
1117 doi:10.1152/jn.00925.2015
- 1118 Sternberg, S., Monsell, S., Knoll, R. L., & Wright, C. E. (1978). The Latency and Duration of  
1119 Rapid Movement Sequences: Comparisons of Speech and Typewriting. In G. E.  
1120 Stelmach (Ed.), *Information Processing in Motor Control and Learning* (pp. 117-152):  
1121 Academic Press.
- 1122 Tecuapetla, F., Jin, X., Lima, S. Q., & Costa, R. M. (2016). Complementary Contributions of  
1123 Striatal Projection Pathways to Action Initiation and Execution. *Cell*, 166(3), 703-715.  
1124 doi:10.1016/j.cell.2016.06.032
- 1125 Thorn, C. A., Atallah, H., Howe, M., & Graybiel, A. M. (2010). Differential dynamics of activity  
1126 changes in dorsolateral and dorsomedial striatal loops during learning. *Neuron*,  
1127 66(5), 781-795. doi:10.1016/j.neuron.2010.04.036
- 1128 Thorn, C. A., & Graybiel, A. M. (2014). Differential entrainment and learning-related  
1129 dynamics of spike and local field potential activity in the sensorimotor and  
1130 associative striatum. *J Neurosci*, 34(8), 2845-2859. doi:10.1523/JNEUROSCI.1782-  
1131 13.2014
- 1132 Turner, K. M., & Parkes, S. L. (2020). Prefrontal regulation of behavioural control: Evidence  
1133 from learning theory and translational approaches in rodents. *Neurosci Biobehav*  
1134 *Rev*, 118, 27-41. doi:10.1016/j.neubiorev.2020.07.010
- 1135 Vandaele, Y., & Janak, P. H. (2021). Unveiling the neural correlates of habit in the dorsal  
1136 striatum. *bioRxiv*, 2021.2004.2003.438314. doi:10.1101/2021.04.03.438314
- 1137 Vandaele, Y., Mahajan, N. R., Ottenheimer, D. J., Richard, J. M., Mysore, S. P., & Janak, P. H.  
1138 (2019). Distinct recruitment of dorsomedial and dorsolateral striatum erodes with  
1139 extended training. *Elife*, 8. doi:10.7554/eLife.49536
- 1140 Wassum, K. M., Ostlund, S. B., & Maidment, N. T. (2012). Phasic mesolimbic dopamine  
1141 signaling precedes and predicts performance of a self-initiated action sequence task.  
1142 *Biol Psychiatry*, 71(10), 846-854. doi:10.1016/j.biopsych.2011.12.019
- 1143 Yin, H. H. (2009). The role of the murine motor cortex in action duration and order. *Frontiers*  
1144 *in Integrative Neuroscience*, 3, 23. doi:10.3389/neuro.07.023.2009
- 1145 Yin, H. H. (2010). The sensorimotor striatum is necessary for serial order learning. *J Neurosci*,  
1146 30(44), 14719-14723. doi:10.1523/JNEUROSCI.3989-10.2010
- 1147 Yin, H. H., & Knowlton, B. J. (2006). The role of the basal ganglia in habit formation. *Nat Rev*  
1148 *Neurosci*, 7(6), 464-476. doi:10.1038/nrn1919
- 1149 Yin, H. H., Knowlton, B. J., & Balleine, B. W. (2004). Lesions of dorsolateral striatum preserve  
1150 outcome expectancy but disrupt habit formation in instrumental learning. *Eur J*  
1151 *Neurosci*, 19(1), 181-189. doi:10.1111/j.1460-9568.2004.03095.x
- 1152 Yin, H. H., Knowlton, B. J., & Balleine, B. W. (2005). Blockade of NMDA receptors in the  
1153 dorsomedial striatum prevents action-outcome learning in instrumental  
1154 conditioning. *Eur J Neurosci*, 22(2), 505-512. doi:10.1111/j.1460-9568.2005.04219.x

- 1155 Yin, H. H., Knowlton, B. J., & Balleine, B. W. (2006). Inactivation of dorsolateral striatum  
1156 enhances sensitivity to changes in the action-outcome contingency in instrumental  
1157 conditioning. *Behav Brain Res, 166*(2), 189-196. doi:10.1016/j.bbr.2005.07.012  
1158 Yin, H. H., Mulcare, S. P., Hilario, M. R., Clouse, E., Holloway, T., Davis, M. I., . . . Costa, R. M.  
1159 (2009). Dynamic reorganization of striatal circuits during the acquisition and  
1160 consolidation of a skill. *Nat Neurosci, 12*(3), 333-341. doi:10.1038/nn.2261  
1161 Yin, H. H., Ostlund, S. B., Knowlton, B. J., & Balleine, B. W. (2005). The role of the  
1162 dorsomedial striatum in instrumental conditioning. *Eur J Neurosci, 22*(2), 513-523.  
1163 doi:10.1111/j.1460-9568.2005.04218.x  
1164
